# Supplementary material for: Metabolite Profiling in Green Microalgae with Varying Degrees of Desiccation Tolerance
Source: MDPI journal article supplement (doi:10.3390/microorganisms10050946), 2022-04-30
Supplement: s1 [file s1]

**Table S2.** Concentrations of proline, sorbitol and prasiolin in *Edaphochlorella mirabilis* and *Diplosphaera epiphytica* ( $n = 3$ , mean value  $\pm$  SD). Proline was measured spectrophotometrically and sorbitol and prasiolin by HPLC; concentrations are given in  $\mu\text{mol g}^{-1}$  dry weight. Proline and prasiolin concentrations were significantly different between the two strains ( $P < 0.05$ ).

| Metabolite | <i>E. mirabilis</i> | <i>D. epiphytica</i> |
|------------|---------------------|----------------------|
| Proline    | 64.5 $\pm$ 8.91     | 152.6 $\pm$ 9.05     |
| Sorbitol   | n.d.                | 168.2 $\pm$ 21.5     |
| Prasiolin  | 3.6 $\pm$ 0.06      | 17.2 $\pm$ 0.96      |

n.d.: not detected.
