# Supplementary material for: Metabolite Profiling in Green Microalgae with Varying Degrees of Desiccation Tolerance
Source: MDPI journal article supplement (doi:10.3390/microorganisms10050946), 2022-04-30
Supplement: s1 [file s1]

**Table S1.** Characteristic parameters of ETR curves of *Edaphochlorella mirabilis* and *Diplosphaera epiphytica*.

| Species / treatment            | ETR <sub>max</sub>      | I <sub>k</sub>            | $\alpha$                   | $\beta$                     |
|--------------------------------|-------------------------|---------------------------|----------------------------|-----------------------------|
| <i>D. epiphytica</i> untreated | 35.7 ± 5.5 <sup>B</sup> | 125.2 ± 19.7 <sup>A</sup> | 0.297 ± 0.008 <sup>A</sup> | -0.002 ± 0.002 <sup>A</sup> |
| <i>D. epiphytica</i> D/RH      | 23.3 ± 0.4 <sup>A</sup> | 81.2 ± 3.8 <sup>B</sup>   | 0.304 ± 0.007 <sup>A</sup> | -0.003 ± 0.001 <sup>A</sup> |
| <i>E. mirabilis</i> untreated  | 25.7 ± 3.2 <sup>A</sup> | 143.3 ± 11.0 <sup>A</sup> | 0.179 ± 0.013 <sup>B</sup> | -                           |
| <i>E. mirabilis</i> D/RH       | 20.9 ± 2.4 <sup>A</sup> | 135.1 ± 12.3 <sup>A</sup> | 0.196 ± 0.030 <sup>B</sup> | -0.010 ± 0.001 <sup>B</sup> |

D/RH denotes values after the desiccation-rehydration treatment. Data were calculated by using the fitting model according to Webb et al. 1974 or Walsby 1997 depending on either photoinhibition occurred or not ( $n = 4$ , mean value ± SD). ETR<sub>max</sub>, maximum electron transport rate ( $\mu\text{mol electrons m}^{-2} \text{s}^{-1}$ ),  $\alpha$  initial slope at limiting photofluence rates (electrons photon<sup>-1</sup>), I<sub>k</sub> initial value of light-saturated photosynthesis ( $\mu\text{mol photons m}^{-2} \text{s}^{-1}$ ). Different capital letters indicate significant differences and were calculated by two-way ANOVA followed by Tukey's post hoc test ( $P < 0.05$ ).
