# Supplementary material for: Metabolite Profiling in Green Microalgae with Varying Degrees of Desiccation Tolerance
Source: Microorganisms. 2022 Apr 30;10(5):946. doi: 10.3390/microorganisms10050946 (PMC9144557; doi:10.3390/microorganisms10050946)
Supplement: Supplementary file 1 [file microorganisms-10-00946-s001.zip › Aigner_et_al_2022_Table_S3.xlsx]

## Sheet: a)Relative_contents
Table S3A: Relative abundances for all reported compounds.
A specific fragment was selected for the relative quantification of each compound based on the data generated with AMDIS and then, the corresponding peak areas were determined at the expected compound retention times using the Xcalibur v4.2 processing software (Thermo Scientific) with the “genesis” algorithm. All peak integrations were subsequently assessed using the Xcalibur Quan browser. Missin…
Identification		From		"STD": Metabolites previously injected on the instrument as standards for which spectrum and retention index were saved in a home-made library.
				"LIB": Metabolites identified by comparison with available public and commercial libraries: NIST, Fiehn, Golm and Gilles Clement (IJPB Versailles, France) libraries.
		With		"AMDIS": Identification validated with the AMDIS software by interrogating an home-made library taking into account both the spectrum and retention index comparison.
				"MS-Search": Identification verified through interrogation of the public and commercial libraries using the MS-Search (v2.3) software (spectrum and retention index comparison).
Library & quantification method information		Derivative		Different derivatization states resulting from the method; tms: trimethylsilyl derivatives; meox: methoxime derivatives #SUM indicates cases for which the data obtained for the syn- and anti- forms of methoxime derivatives (labelled meox1 and meox2) were summed to one value before scaling.
		RI		Kovats alkane-based retention index (Kovats, 1958)
		RT		Retention time as used in the Xcalibur quantification method in minutes.
		m/z		Mass to charge ratio of the fragment used for quantification (area under the peaks integration).
		Class		AA: Amino acids; APO: Apolar; FA: Fatty acids; OA: Organic acids; PHOSPHO: Phosphorylated compounds; SUG: Sugars; S-OL: Sugar alcohols; UNK: Unknown
		Select		For metabolites giving more than one derivative, only the labelled rows (x) were kept for the differential analysis to prevent redundancies. The selection was operated as follow: - The syn- and anti- forms of methoxime derivatives (labelled meox1 and meox2) were summed to one value (assuming both were detected and properly integrated). - For trimethylsilyl derivatives, either only the most abunda…
Identification		Library & quantification method information								Area under the trace ions peaks normalized using the internal standard L-Valine13C5, 15N
From	With	Metabolites	Derivative	RI	RT	m/z	Class	Select	Compounds	CVterr_CTR_R1	CVterr_CTR_R2	CVterr_CTR_R3	EM_CTR_R1	EM_CTR_R2	EM_CTR_R3	DE_CTR_R1	DE_CTR_R2	DE_CTR_R3	CVaqu_CTR_R1	CVaqu_CTR_R2	CVaqu_CTR_R3	CVterr_D/R_R1	CVterr_D/R_R2	CVterr_D/R_R3	EM_D/R_R1	EM_D/R_R2	EM_D/R_R3	DE_D/R_R1	DE_D/R_R2	DE_D/R_R3	CVaqu_D/R_R1	CVaqu_D/R_R2	CVaqu_D/R_R3
STD	AMDIS	4-Hydroxyproline	3tms	1521	18.0519	230	AA	x	4-Hydroxyproline$3tms	0.00625371	0.00621274	0.0075683	0.0891873	0.0932997	0.0850928	0.35724	0.289242	0.298509	0.00332868	0.00337141	0.00373051	0.00446139	0.00338294	0.00405414	0.0470419	0.0176529	0.0158385	0.297586	0.310752	0.360737	0.00407918	0.00519232	0.00560237
STD	AMDIS	Alanine	2tms	1110	11.4764	116	AA	x	Alanine$2tms	1.17382	0.900202	0.879735	0.943365	0.547862	0.484226	2.12751	1.67571	1.77833	0.0708816	0.105229	0.212809	0.415902	0.701679	0.620329	0.67666	0.379095	0.31103	1.43265	1.43279	1.56532	0.537943	0.664392	0.544129
STD	MS-Search	Alanine	3tms	1357	15.8248	262	AA		Alanine$3tms	0.11117	0.109316	0.149642	0.0371874	0.0315666	0.0316426	0.198587	0.186368	0.175613	0.00677996	0.0130666	0.0345585	0.046092	0.108764	0.106506	0.0291504	0.0345076	0.0450644	0.131086	0.113267	0.168808	0.0382771	0.0716434	0.0549014
STD	AMDIS	Arginine (unknown derivative)	#1	1635	19.4309	315	AA		Arginine#1 (unknown derivative)	0.0373236	0.0380748	0.0361685	0.0188749	0.0195845	0.0177754	0.0155165	0.0104598	0.010907	0.00126471	0.00124086	0.00110907	0.022334	0.0215755	0.0228781	0.03324	0.0146037	0.0110198	0.0204142	0.0253621	0.0388671	0.00400105	0.00421544	0.00605755
STD	AMDIS	Arginine | Citrulline	#3 (3tms)	1817	21.477	256	AA		Arginine#3 (Citrulline$3tms)	0.0142613	0.0151572	0.0146482	0.00913705	0.00916807	0.00955189	0.00951716	0.00665724	0.00868295	0.000524996	0.000376187	0.000595401	0.00869139	0.00947177	0.00995896	0.0120968	0.00614997	0.00604029	0.00871369	0.0126105	0.0225585	0.00309733	0.00344338	0.00558146
STD	AMDIS	Arginine | Ornithine	#2 (4tms)	1811	21.4204	174	AA	x	Arginine#2 (Ornithine$4tms)	0.335074	0.304686	0.290841	0.105335	0.106572	0.102193	0.109953	0.0791721	0.0846898	0.00503917	0.00816987	0.00599526	0.158274	0.160874	0.156726	0.190982	0.0845229	0.0801795	0.169933	0.202946	0.290076	0.0242714	0.0258335	0.0345957
STD	AMDIS	Arginine | Ornithine	#4 (5tms)	2034	23.6639	214	AA		Arginine#4 (Ornithine$3tms)	0.0413284	0.0507026	0.12822	0.00219451	0.00269166	0.00305892	0.0103954	0.0142619	0.00949873	0.000336429	0.00112649	0.000623216	0.0247655	0.0594039	0.0639057	0.00405864	0.00818833	0.0165819	0.0172988	0.0164877	0.031934	0.0013301	0.00355164	0.00354803
STD	AMDIS	Asparagine	3tms	1662	19.7557	231	AA	x	Asparagine$3tms	0.00184773	0.0030333	0.00241498	0.0123149	0.0120864	0.0118235	0.00777596	0.00655542	0.00747391	0.000247212	0.000100125	0.000190851	0.00282213	0.0014067	0.00160185	0.0234437	0.0123439	0.0103527	0.0127324	0.0157833	0.0187241	0.00016187	0.000501919	0.000453821
STD	AMDIS	Asparagine (-H2O)	2tms	1496	17.7339	243	AA		Asparagine(-H2O)$2tms	0.0767304	0.0967768	0.0838554	0.517519	0.552956	0.571204	0.267628	0.183302	0.229395	0.00847765	0.00810516	0.00732217	0.0612812	0.0483846	0.0538458	0.924021	0.44928	0.347621	0.402747	0.480047	0.673845	0.0167939	0.015854	0.0125712
STD	AMDIS	Aspartate	3tms	1514	17.9623	232	AA	x	Aspartate$3tms	2.65542	2.95093	2.98836	0.735551	1.42934	1.27744	0.925131	0.775122	0.917023	0.609487	0.731516	0.450706	1.36173	0.844331	0.881511	1.17614	0.829185	0.561774	1.34423	1.71551	2.00421	0.640037	0.351429	0.108125
STD	MS-Search	Aspartate	4tms	1725	20.4765	205	AA		Aspartate$4tms	0.0719662	0.0982434	0.210072	0.014894	0.0148846	0.0150419	0.059366	0.0438392	0.0568781	0.0124306	0.0280209	0.0206818	0.0298895	0.0392236	0.0419424	0.00833903	0.016201	0.0201624	0.06506	0.0807244	0.111507	0.0161292	0.0121722	0.00259421
STD	AMDIS	GABA	3tms	1527	18.11	174	AA	x	GABA$3tms	0.000592485	0.000899015	0.0011141	0.00329935	0.00263728	0.00253101	0.00119484	0.000729129	0.00207133	0.000375049	0.000309331	0.00030715	0.00677309	0.000909197	0.000965155	0.00207572	0.00140087	0.00136992	0.00104758	0.00104078	0.00236051	0.00296317	0.00462113	0.17263
STD	AMDIS	Glutamic acid	3tms	1613	19.18	246	AA		Glutamate$3tms	0.00106595	0.00110983	0.000685362	0.36118	0.360497	0.19301	0.0015058	0.000348581	0.00056626	0.00046094	0.00085648	0.000470692	0.00111553	0.00049738	0.000714903	0.510223	0.00218375	0.00143572	0.00238778	0.00546218	0.00273838	0.00143853	0.000327749	0.00132557
STD	AMDIS	Glutamic acid	pyro	1514	17.9822	156	AA	x	Glutamate$pyro	9.60475	10.8496	11.6903	13.1424	14.4976	14.5537	17.1802	14.0554	14.936	2.75438	4.12483	3.2692	5.9263	5.61527	5.9437	10.5915	6.99557	5.75041	13.3886	14.5713	15.9035	3.96975	3.38644	2.35003
STD	AMDIS	Glutamine	3tms	1766	20.9221	156	AA	x	Glutamine$3tms	0.151826	0.120199	0.0660219	0.199916	0.151248	0.154027	0.678251	0.349653	0.565192	0.00515082	0.00872537	0.022476	0.0671977	0.0507679	0.0346137	0.105486	0.0871466	0.0823602	0.682693	0.896066	1.0036	0.154553	0.144266	0.113204
STD	AMDIS	Glutamine	4tms	1725	20.4694	227	AA		Glutamine$4tms	0.0887844	0.0635626	0.00572215	0.222887	0.122611	0.127924	0.874017	0.31644	0.789895	0.000504815	5.08e-05	8.54e-05	0.00989018	0.00146701	0.000219982	0.0692471	0.0204042	0.0121082	0.780829	0.95923	1.56041	0.107924	0.0318675	0.0276497
STD	AMDIS	Glutamine (-H2O)	3tms	1585	18.8481	227	AA		Glutamine(-H2O)$3tms	0.0800115	0.0815224	0.107155	0.0336529	0.0249044	0.0267042	0.633154	0.727551	0.598663	0.000894669	0.00356759	0.0115306	0.022269	0.0478902	0.0419067	0.0154537	0.0415049	0.105312	0.697322	0.746766	0.924363	0.046552	0.119087	0.0237357
STD	AMDIS	Glycine	3tms	1304	15.0431	248	AA	x	Glycine$3tms	0.069686	0.0504469	0.0516836	0.26668	0.177827	0.21932	0.117007	0.114126	0.0816093	0.0118462	0.0133208	0.0114728	0.0413315	0.0305685	0.0349113	0.10943	0.0414511	0.0449672	0.0329325	0.0427315	0.0461723	0.0216237	0.0373503	0.0269747
STD	AMDIS	Isoleucine	2tms	1292	14.837	158	AA	x	Isoleucine$2tms	0.11501	0.158918	0.17966	0.829477	0.732602	0.691079	0.0932774	0.0823169	0.10449	0.416953	0.378932	0.40816	0.0228847	0.0212426	0.0253454	0.213183	0.0518594	0.0495807	0.0318236	0.0376302	0.0504878	0.0446497	0.0611498	0.0240123
STD	AMDIS	Leucine	2tms	1272	14.5011	158	AA	x	Leucine$2tms	0.147432	0.240385	0.242887	1.102	1.02979	1.00848	0.190221	0.16739	0.213112	0.257387	0.246412	0.254167	0.0392877	0.0305026	0.0352412	0.216822	0.0735164	0.0785191	0.0680024	0.0788615	0.104649	0.090197	0.147983	0.0504921
STD	AMDIS	Lysine	4tms	1915	22.506	156	AA	x	Lysine$4tms	0.114765	0.127453	0.136449	0.303148	0.276046	0.259136	0.0679694	0.0476411	0.057716	0.0216417	0.0199635	0.0185223	0.184091	0.177165	0.164985	0.296881	0.0929777	0.0567947	0.0863027	0.113747	0.108116	0.0178777	0.0198977	0.0274899
STD	MS-Search	Methionine	2tms	1514	17.9598	176	AA	x	Methionine$2tms	0.0710696	0.0895333	0.0992501	0.08032	0.0757464	0.0774409	0.102195	0.0765698	0.0851606	0.0261446	0.0235534	0.0242847	0.0272009	0.0242135	0.029151	0.0614533	0.0362967	0.0357145	0.068657	0.0738883	0.097289	0.0269851	0.0278539	0.0176637
STD	AMDIS	Phenylalanine	2tms	1622	19.2872	218	AA	x	Phenylalanine$2tms	0.0695559	0.117216	0.13286	0.168828	0.146239	0.139527	0.0423232	0.0378393	0.0611922	0.041292	0.0373595	0.0418182	0.0188191	0.0194129	0.0227954	0.0764512	0.0182075	0.0189462	0.0144477	0.0188497	0.0431353	0.0289298	0.0488202	0.0203548
STD	AMDIS	Proline	2tms	1295	14.8996	142	AA	x	Proline$2tms	1.92271	2.05587	1.6683	0.433193	0.402184	0.3692	5.52097	4.19061	3.82198	0.203427	0.335902	0.199154	0.613529	0.717726	0.481721	0.477349	0.4423	0.297328	2.72495	3.2833	4.20772	0.206007	0.34297	0.478618
STD	AMDIS	Serine	3tms	1357	15.8208	218	AA	x	Serine$3tms	0.2389	0.263011	0.200282	0.2175	0.327018	0.309636	1.75446	1.16193	1.31205	0.0837329	0.0773916	0.082912	0.13409	0.102312	0.106417	0.403851	0.0955683	0.104808	0.648187	0.645795	0.916774	0.113826	0.118836	0.0939557
STD	MS-Search	Serine	4tms	1568	18.6349	276	AA		Serine$4tms	0.0610822	0.0782254	0.156175	0.0397468	0.0424316	0.0353774	0.390698	0.413107	0.366594	0.0298868	0.0435121	0.0530665	0.0355478	0.0515503	0.0605974	0.0541785	0.0212827	0.0397362	0.116885	0.114224	0.183044	0.0256518	0.0382631	0.023186
STD	AMDIS	Threonine	3tms	1382	16.1868	218	AA	x	Threonine$3tms	0.381623	0.453092	0.509751	0.371497	0.376309	0.358553	0.415607	0.326913	0.363052	0.218436	0.200646	0.223727	0.12087	0.109485	0.126296	0.184941	0.0652655	0.0495543	0.165796	0.181684	0.215093	0.0725782	0.0751949	0.0453916
STD	MS-Search	Tyrosine	3tms	1935	22.6679	382	AA	x	Tyrosine$3tms	0.00436472	0.0058984	0.0056757	0.00275673	0.00275819	0.00296731	0.00182698	0.00150762	0.00229919	0.00216529	0.0016041	0.00208365	0.00179022	0.00155231	0.00196581	0.00193295	0.00133943	0.00154362	0.00142397	0.0023442	0.00167478	0.00210445	0.00277946	0.00256538
STD	With IS	Valine	2tms	1217	13.583	144	AA	x	Valine$2tms	0.701573	0.884479	0.948839	1.56633	1.45452	1.39408	0.264147	0.232526	0.286822	0.706201	0.571552	0.674426	0.17004	0.148224	0.167886	0.681417	0.185147	0.209582	0.105906	0.12045	0.147441	0.247898	0.334879	0.146609
LIB	AMDIS	α-Aminoadipate	3tms	1707	20.2801	260	AA	x	α-Aminoadipate$3tms	0.0101905	0.0122163	0.0124934	0.0544357	0.0527467	0.050326	0.00238035	0.00137554	0.00191425	0.0010719	0.00118442	0.00089184	0.00329923	0.00205296	0.00218227	0.0250947	0.00803171	0.00768528	0.00197848	0.00174208	0.00277142	0.012957	0.00884054	0.0094737
STD	AMDIS	Alpha-Tocopherol	1tms	3143	32.3115	502	APO	x	Alpha-Tocopherol$tms	0.072007	0.0954819	0.078338	0.0629431	0.063943	0.0658231	0.0209481	0.0145162	0.0191601	0.0587287	0.0673518	0.0741252	0.0431043	0.0446065	0.0425878	0.0583218	0.0288476	0.0248965	0.0240036	0.0195276	0.0297418	0.0272262	0.0241951	0.0333977
LIB	MS-Search	Beta-sitosterol	1tms	3341	33.6992	396	APO	x	Beta-sitosterol$1tms	0.000250916	0.000235761	0.0001	0.0172798	0.026084	0.0336972	0.00130812	0.000906169	0.00115847	0.000229019	0.000242509	0.000231763	6.61e-05	0.000149607	0.000184207	0.018661	0.0217708	0.0193932	0.00132993	0.00151416	0.000915393	0.000196595	0.000213654	0.000129732
LIB	AMDIS	Campesterol	1tms	3261	33.1301	382	APO	x	Campesterol$1tms	3.8e-05	2.54e-05	6.17e-05	0.102027	0.0972891	0.0988076	0.0986279	0.0787958	0.0901608	0.000835788	0.000687187	0.000786227	3.89e-05	7.03e-05	2.59e-05	0.0985874	0.0779697	0.0751428	0.0894796	0.0941176	0.111451	0.00076191	0.00107738	0.000509185
LIB	MS-Search	Ergosterol	1tms	3243	33.0051	363	APO	x	Ergosterol$1tms	0.190863	0.228602	0.158698	2.7e-05	0.00010981	9.86e-05	2.07e-05	5.08e-05	0.000134766	0.204168	0.208925	0.210199	0.108126	0.111321	0.111742	7.79e-05	7.35e-05	8.47e-05	7.86e-05	7.44e-05	6.06e-05	0.0969988	0.118427	0.0919487
LIB	AMDIS	Phytol	1tms	2168	24.9188	143	APO	x	Phytol$1tms	0.0882875	0.121096	0.086131	0.0795848	0.0820468	0.0744132	0.0921906	0.0565083	0.066633	0.0308681	0.0430564	0.0336907	0.0743108	0.0771685	0.077168	0.0958957	0.065231	0.0520269	0.0636795	0.0634896	0.087296	0.05646	0.0899488	0.0502286
LIB	MS-Search	Stigmasterol	1tms	3285	33.3007	255	APO	x	Stigmasterol$1tms	0.000439105	0.00030464	0.000140395	0.0386866	0.0371416	0.0360598	0.104063	0.0831344	0.0917433	0.00111275	0.000697805	0.000634298	0.000177257	0.000135208	0.000134156	0.0604331	0.0431493	0.0372949	0.104354	0.113443	0.134024	0.000835607	0.00181509	0.000312262
STD	MS-Search	C14:0 (Myristic acid)	1tms	1844	21.7555	285	FA	x	C14:0$1tms	0.0890079	0.0778782	0.0791981	0.0448833	0.0436575	0.0432079	0.0606022	0.0472622	0.0353384	0.0260671	0.0313284	0.018636	0.0259196	0.0257173	0.0372228	0.0370799	0.0359822	0.0290271	0.029669	0.0367041	0.0327911	0.019601	0.0361026	0.0346445
LIB	AMDIS	C18:1 (Oleic acid isomer)	1tms	2218	25.3697	339	FA	x	C18:1b$1tms	0.00800623	0.0114818	0.0103239	0.0127882	0.0131818	0.0129502	0.02107	0.0130037	0.0179607	0.0135085	0.00815466	0.00809122	0.00897545	0.0096415	0.0108481	0.0178426	0.0236259	0.0287518	0.0198319	0.0168404	0.0197311	0.00704062	0.0148437	0.0398412
STD	AMDIS	C18:1 (Oleic acid)	1tms	2212	25.3119	339	FA	x	C18:1a$1tms	0.0289459	0.0357959	0.0265863	0.0192644	0.0162985	0.0164545	0.0342968	0.0236466	0.0311946	0.0948025	0.0388091	0.0518959	0.023268	0.0216667	0.0239662	0.015698	0.0169479	0.0205411	0.0315476	0.0317915	0.0343492	0.0359483	0.095414	0.448168
STD	AMDIS	C18:2 (Linoleic acid)	1tms	2205	25.2598	337	FA	x	C18:2$1tms	0.0211612	0.0212728	0.0229999	0.00698409	0.00945162	0.00855613	0.0282152	0.0225971	0.0246901	0.0256982	0.0130447	0.0147958	0.012813	0.0130594	0.0178291	0.00622048	0.00787421	0.00745313	0.0223485	0.0234656	0.0273687	0.00847311	0.0146018	0.0515951
STD	MS-Search	C18:3 (Linolenic acid)	1tms	2212	25.3182	335	FA	x	C18:3$1tms	0.0288313	0.0257584	0.0259483	0.0235232	0.0233753	0.028215	0.0158836	0.0121572	0.0162573	0.0361377	0.0179942	0.0200268	0.0146235	0.0122675	0.0163868	0.0113992	0.00854808	0.00768821	0.00833237	0.0110772	0.0134694	0.0125586	0.0194923	0.0532208
STD	AMDIS	2-Oxoglutarate	2tms	1568	18.6293	198	OA	x	2-Oxoglutarate$2tms	0.0324504	0.0237863	0.0251177	0.0588654	0.0136607	0.0150518	0.0288829	0.0237989	0.0173021	0.0164032	0.03086	0.0459867	0.0222614	0.0121613	0.0114462	0.00830671	0.00532406	0.00576576	0.00753062	0.00893292	0.00886063	0.00588337	0.0129816	0.33945
STD	MS-Search	Aconitate	3tms	1740	20.6354	229	OA	x	Aconitate$3tms	0.000632279	0.000425795	0.000427142	0.00466407	0.00629239	0.00570006	0.00184808	0.000778333	0.000729905	0.000229468	0.000209253	0.000333181	0.000177944	0.000305509	0.000340898	0.00416388	0.001766	0.00141197	0.000618525	0.000641344	0.000566917	0.000763526	0.000716428	0.00189961
STD	AMDIS	Citrate	4tms	1811	21.4077	273	OA	x	Citrate$4tms	0.0628864	0.042138	0.0578256	2.06898	2.14778	2.11306	0.706837	0.592316	0.595191	0.0172252	0.021943	0.0350044	0.0876515	0.0854444	0.0897054	1.81223	0.680721	0.651601	0.760862	0.797763	0.675508	0.1461	0.127886	0.181927
STD	AMDIS	Dehydroascorbate	3tms	1867	22.0005	316	OA		Dehydroascorbate$3tms	0.00800848	0.00880792	0.0091558	0.0164103	0.0155443	0.0158727	0.0149449	0.014162	0.013479	0.00761559	0.00800274	0.0059688	0.00236868	0.00277262	0.00251373	0.00641016	0.00236104	0.00188392	0.00623224	0.00627283	0.00673121	0.00112276	0.00100611	0.00052907
STD	AMDIS	Dehydroascorbate-Dimer	meox2-dimer	1840	21.7234	316	OA	x	DHA-dimer$2meox	0.0647367	0.0699867	0.0805966	0.139626	0.124765	0.12968	0.134952	0.118803	0.110487	0.0662052	0.0636517	0.0513936	0.0168962	0.0200925	0.0164857	0.0508218	0.0189022	0.0146028	0.0527863	0.0449828	0.0551121	0.00755383	0.00785038	0.00360261
STD	AMDIS	Fumarate	2tms	1349	15.6791	245	OA	x	Fumarate$2tms	0.0603863	0.0351304	0.0407804	0.017927	0.0111973	0.0117295	0.0194766	0.0138962	0.0128618	0.0892105	0.0558285	0.0529322	0.0198056	0.0241531	0.0284519	0.0107415	0.00883401	0.00911788	0.00907363	0.00909035	0.00939174	0.0179002	0.0230109	0.0289498
STD	AMDIS	Glycerate	3tms	1328	15.3775	292	OA	x	Glycerate$3tms	0.00777578	0.00764875	0.00771899	0.00376011	0.00312457	0.00270389	0.00725519	0.00486852	0.00566644	0.0038097	0.00305033	0.00345408	0.00661664	0.00465031	0.00554996	0.00284191	0.00247606	0.00216645	0.00259461	0.00338298	0.00318105	0.00312701	0.00581756	0.0209895
STD	AMDIS	Glycolate	2tms	1082	10.9041	147	OA	x	Glycolate$2tms	0.147935	0.132906	0.127127	0.0824781	0.0596339	0.0591745	0.0996798	0.0725661	0.094199	0.0802453	0.0639306	0.087633	0.105199	0.0795335	0.104642	0.0552444	0.0661203	0.0547664	0.0639202	0.0798565	0.0749179	0.0918027	0.12204	0.173101
STD	AMDIS	Malate	3tms	1483	17.5471	233	OA	x	Malate$3tms	0.0583752	0.0316743	0.0385735	0.211779	0.110641	0.136741	0.205957	0.194159	0.111836	0.0936917	0.0882622	0.0695081	0.0167281	0.0237319	0.0283076	0.0594232	0.0436902	0.0550693	0.0542934	0.052506	0.0563563	0.0173119	0.0189341	0.0215087
LIB	AMDIS	Pipecolate	2tms	1363	15.903	156	OA	x	Pipecolate$2tms	0.000237141	0.00041887	0.000341912	0.00400865	0.0037537	0.00316712	0.00242776	0.0018004	0.00223592	0.0100984	0.0152991	0.00620494	0.00104564	0.00069441	0.000161955	0.00510539	0.010219	0.00599446	0.013281	0.0119326	0.0109077	0.122996	0.0674378	0.0695915
STD	AMDIS	Succinate	2tms	1312	15.1437	147	OA	x	Succinate$2tms	0.283627	0.254625	0.222902	0.22729	0.077315	0.0766627	0.22938	0.169735	0.198485	0.512462	0.44783	0.403472	0.270441	0.176277	0.222916	0.091426	0.0873513	0.100838	0.0831582	0.0996284	0.105147	0.130565	0.162919	0.939945
LIB	AMDIS	Threonate	3tms	1553	18.4558	292	OA	x	Threonate$3tms	0.0347475	0.0379563	0.0331275	0.0377413	0.0385731	0.0406964	0.0235325	0.021303	0.0338329	0.0135319	0.0142422	0.014496	0.0165724	0.0115415	0.0111861	0.0161578	0.0102895	0.00804889	0.0110733	0.0137634	0.0131782	0.00702438	0.00607564	0.0121805
LIB	MS-Search	Adenine	2tms	1862	21.9544	264	OTHER	x	Adenine$2tms	0.0201793	0.021	0.0185296	0.0156178	0.0152869	0.0149262	0.0258273	0.0163109	0.0190896	0.00672627	0.0114415	0.00714719	0.018483	0.0149444	0.01765	0.0194921	0.0152485	0.013689	0.0174587	0.0233484	0.0218723	0.0116467	0.0172104	0.011245
LIB	AMDIS	Allantoin	1tms	1877	22.1086	331	OTHER	x	Allantoin$1tms	0.0307251	0.0572614	0.0510414	0.407286	0.463416	0.518422	0.000362397	0.00021334	0.000534816	0.000156223	0.000194839	0.000247922	0.014738	0.0115054	0.00533962	0.262519	0.0625836	0.0448686	0.000237639	0.000391301	0.000219568	0.000503569	0.000356087	0.000344207
STD	AMDIS	Putrescine	4tms	1735	20.5868	174	OTHER	x	Putrescine$4tms	0.300282	0.294308	0.287676	0.00138929	0.00279776	0.00189091	0.108655	0.0390663	0.0570299	0.000963521	0.00210197	0.000461671	0.138828	0.0822197	0.0993498	0.00570715	0.00693515	0.0135264	0.0326873	0.0366252	0.0606963	0.00924412	0.00832968	0.0046737
LIB	AMDIS	Uracil	2tms	1334	15.4799	241	OTHER	x	Uracil$3tms	0.012768	0.0144979	0.0149118	0.00810481	0.00803886	0.00940043	0.0124446	0.00906065	0.0117882	0.00467105	0.00604521	0.00790763	0.0130161	0.0123732	0.0131	0.00861098	0.01061	0.011611	0.0120336	0.0123976	0.0111763	0.00812712	0.0116571	0.0103447
LIB	MS-Search	Urea	3tms	1184	12.9767	171	OTHER	x	Urea$3tms	0.0390571	0.0194732	0.0145734	0.130315	0.0852988	0.0620301	0.0160735	0.011812	0.00849977	0.00774274	0.00268203	0.0030913	0.0185315	0.0105776	0.00742582	0.0771568	0.02493	0.0224722	0.0155334	0.00784899	0.00679161	0.00393353	0.00950173	0.0047228
LIB	AMDIS	bis-glycerol-Phosphate	5tms	2182	25.0469	357	PHOSPHO	x	bis-glycerol-P$5tms	0.172543	0.308605	0.234394	0.338511	0.366269	0.399602	0.706158	0.538429	0.659679	0.635197	0.60604	0.7306	0.299011	0.327824	0.280348	0.418223	0.200851	0.12918	0.643807	0.615406	0.743393	0.10474	0.113317	0.231366
STD	AMDIS	Fructose-6-Phosphate	6tms / meox1	2298	26.0537	315	PHOSPHO	x	Fructose-6-P$meox1	0.00011564	0.000355825	0.000626938	0.000628529	0.000924762	0.00147649	0.00123184	0.000894077	0.00150235	0.000444379	0.000962692	0.00123008	0.00157532	0.00294181	0.00209114	0.00121511	0.000774515	0.000974455	0.00226267	0.00188838	0.00262362	0.00546355	0.00917046	0.152677
STD	AMDIS	Glucose-6-Phosphate	6tms / meox1	2310	26.1628	387	PHOSPHO		Glucose-6-P$meox1	0.000271729	0.000769027	0.00137744	0.00164361	0.00179072	0.0021644	0.00306745	0.00298292	0.00293931	0.00190825	0.00269081	0.00251572	0.00305728	0.0049185	0.00467401	0.00223041	0.00169787	0.00264046	0.00611943	0.00490679	0.00593965	0.00921905	0.0234073	0.24243
STD	AMDIS	Glucose-6-Phosphate	6tms / meox2	2330	26.3349	387	PHOSPHO		Glucose-6-P$meox2	0.000111923	0.000113162	0.000194905	0.000331674	0.000356966	0.000419622	0.000577766	0.000623234	0.00040995	0.000310124	0.000405767	0.000391985	0.000655549	0.000995684	0.000889791	0.000460402	0.000385512	0.000368212	0.000916611	0.000915722	0.00116478	0.00166334	0.00407944	0.0378963
STD	AMDIS	Glucose-6-Phosphate	SUM				PHOSPHO	x	Glucose-6-P$SUM	0.000383652	0.000882189	0.00157235	0.00197529	0.00214769	0.00258402	0.00364522	0.00360615	0.00334926	0.00221837	0.00309658	0.00290771	0.00371283	0.00591418	0.0055638	0.00269081	0.00208338	0.00300868	0.00703604	0.00582251	0.00710443	0.0108824	0.0274868	0.280326
LIB	AMDIS	Glycerol-2-Phosphate	4tms	1716	20.3711	299	PHOSPHO	x	Glycerol-2-P$4tms	0.0107238	0.0134421	0.0126021	0.00889481	0.0102815	0.0103819	0.00789238	0.00572513	0.00708873	0.0041139	0.00574822	0.00599541	0.00581666	0.00598377	0.00643225	0.00898672	0.00690828	0.00605649	0.00784353	0.00641466	0.008196	0.00396739	0.00477759	0.0046163
STD	AMDIS	Glycerol-3-Phosphate	4tms	1752	20.7733	357	PHOSPHO	x	Glycerol-3-P$4tms	0.0232565	0.03473	0.0312275	0.020214	0.0226259	0.0226276	0.0164128	0.0120393	0.016008	0.0119026	0.0193138	0.0169319	0.015153	0.0179155	0.0179119	0.0225764	0.0156994	0.0134486	0.0152396	0.0152854	0.0199442	0.0098677	0.0125217	0.0112796
LIB	AMDIS	Myo-inositol-1-Phosphate	7tms	2408	26.9934	318	PHOSPHO	x	Myo-inositol-1P$7tms	0.14497	0.25089	0.234703	0.158772	0.213658	0.205146	0.198585	0.159114	0.22814	0.0780777	0.133815	0.176667	0.118134	0.145175	0.14834	0.206623	0.108018	0.102291	0.253342	0.238159	0.354783	0.10329	0.128104	0.107109
STD	AMDIS	Phosphate	3tms	1270	14.4767	299	PHOSPHO	x	Phosphate$3tms	1.8609	3.88936	3.89446	1.95556	2.30662	2.6603	3.63371	2.55133	3.62329	0.609551	1.9671	1.82506	2.26834	2.53338	2.77075	2.40744	2.30392	2.0009	3.31427	2.90445	3.5337	1.55755	1.88651	2.12799
LIB	AMDIS	Trehalose-6-Phosphate	9tms	3174	32.5221	315	PHOSPHO	x	Trehalose-6P$9tms	0.00055034	0.00189619	0.000247918	0.0108976	0.00990129	0.0152783	0.00133494	0.000119297	0.000415252	0.00487138	0.00685155	0.00659954	0.00338083	0.00250025	0.000697005	0.0173825	0.0160798	0.0184298	0.00132094	0.000269115	0.0013176	0.0363489	0.0381653	0.0430188
STD	AMDIS	Arabitol	5tms	1711	20.349	217	S-OL	x	Arabitol$5tms	0.0102738	0.0115011	0.0229049	0.0101719	0.00742739	0.00700601	0.123116	0.103787	0.115862	0.0610771	0.0247229	0.0381893	0.0190303	0.0172931	0.0141128	0.00789852	0.00489181	0.00676759	0.111035	0.0919635	0.100884	0.0429452	0.0659818	0.021317
STD	AMDIS	Glycerol	3tms	1274	14.5405	205	S-OL	x	Glycerol$3tms	0.182012	0.151232	0.171198	0.121008	0.103466	0.104979	0.113107	0.087868	0.0884534	0.173276	0.0837735	0.0868899	0.163942	0.112296	0.143996	0.0989655	0.0927018	0.0945844	0.100513	0.116428	0.116836	0.101254	0.158087	0.450856
STD	AMDIS	Mannitol	6tms	1924	22.5919	319	S-OL	x	Mannitol$6tms	0.0384779	0.0318767	0.0897824	0.011726	0.0141455	0.0123485	0.0578348	0.0511727	0.0616224	0.0818796	0.0380187	0.0540711	0.0439011	0.0210852	0.0578065	0.0167158	0.0139635	0.0105437	0.0944447	0.117267	0.0705383	0.0939476	0.170693	0.0778633
STD	AMDIS	myo-inositol	6tms	2089	24.1724	217	S-OL	x	myo-inositol$6tms	0.231919	0.23117	0.248515	0.58612	0.568321	0.55411	0.955504	0.73691	0.757792	0.363159	0.308314	0.348444	0.360118	0.392726	0.331462	0.306674	0.215688	0.114343	1.12031	1.1961	1.29718	0.301938	0.501373	0.887278
STD	AMDIS	Ribitol	5tms	1721	20.4094	319	S-OL	x	Ribitol$5tms	0.00430155	0.00390877	0.00266935	0.00662226	0.0040726	0.0061342	0.0426825	0.0271889	0.0347835	0.0019946	0.00152199	0.00139738	0.00248625	0.00161796	0.00176167	0.00302791	0.00156134	0.00153967	0.0308841	0.0348759	0.0384577	0.00341582	0.00305424	0.00217818
STD	AMDIS	Sorbitol	6tms	1931	22.6602	319	S-OL	x	Sorbitol$6tms	0.00143241	0.0015701	0.00458438	0.00281025	0.0122319	0.00183261	16.7072	14.94	14.953	0.00188005	0.00150836	0.0029632	0.0019411	0.00148606	0.00309716	0.00115661	0.00236363	0.00108941	14.265	14.971	15.2002	0.00131083	0.00244661	0.00144986
STD	AMDIS	Volemitol	5tms	2211	25.3128	319	S-OL	x	Volemitol$5tms	2.13565e-05	0.000134447	0.000149809	5.06146e-05	0.000178669	7.26999e-05	0.722195	0.705272	0.734958	8.14607e-05	0.000164257	0.000129849	6.25531e-05	0.000181586	6.52031e-05	8.642e-05	6.08541e-05	0.000170027	0.755518	0.705304	0.720363	0.000368366	0.000891474	0.000177424
STD	AMDIS	Xylitol	5tms	1700	20.19	217	S-OL	x	Xylitol$5tms	0.00041938	0.000394245	0.000519329	0.000399606	0.000555343	0.000700125	0.0703039	0.0646042	0.063883	0.000469339	0.000204991	0.000352043	0.000492116	0.00052238	0.000436312	0.000549473	0.000392881	0.000573731	0.0371659	0.0369218	0.0388131	0.00122146	0.00313583	0.00223502
STD	AMDIS	Arabinose	4tms / meox1	1656	19.6814	217	SUG	x	Arabinose$meox1	0.026482	0.0263034	0.0249336	0.0214755	0.0205021	0.0203353	0.03584	0.0260079	0.0266997	0.0234469	0.0179438	0.0198575	0.0189245	0.0152278	0.0207409	0.0201713	0.0187264	0.0167047	0.0214525	0.0288954	0.0342709	0.022438	0.0334227	0.0275533
STD	AMDIS	Fructose	5tms / meox1	1865	21.9768	217	SUG		Fructose$meox1	0.0627992	0.0621243	0.0785209	0.0336357	0.0238728	0.0243539	0.13596	0.0929586	0.105059	0.0686817	0.0829648	0.0531407	0.131867	0.0893298	0.103419	0.0442626	0.0269849	0.0283308	0.102013	0.155604	0.111282	0.0369164	0.0760286	0.110581
STD	AMDIS	Fructose	5tms / meox2	1874	22.0755	217	SUG		Fructose$meox2	0.0408432	0.0429291	0.0488092	0.0251894	0.0168951	0.0164051	0.0739191	0.0477549	0.0567158	0.0434151	0.0519766	0.037117	0.0892294	0.0569309	0.068562	0.0358646	0.0184881	0.0199104	0.0559865	0.084869	0.0565551	0.021233	0.0457991	0.0743067
STD	AMDIS	Fructose	SUM				SUG	x	Fructose$SUM	0.103642	0.105053	0.12733	0.0588251	0.0407679	0.0407591	0.209879	0.140714	0.161775	0.112097	0.134941	0.0902577	0.221096	0.146261	0.171981	0.0801271	0.045473	0.0482412	0.158	0.240473	0.167837	0.0581494	0.121828	0.184888
STD	AMDIS	Galactose	5tms / meox1	1884	22.1806	319	SUG	x	Galactose$meox1	0.0173805	0.015451	0.0149951	0.00649712	0.00565433	0.00656029	0.0288112	0.0213099	0.0197888	0.0127115	0.00857999	0.00743032	0.0143089	0.00822728	0.0130655	0.0063816	0.00657584	0.00675634	0.012963	0.0185185	0.0225233	0.00811679	0.0189639	0.0146213
LIB	MS-Search	Galactosylglycerol	6tms	2304	26.1113	204	SUG	x	Galactosylglycerol$6tms	0.0343013	0.0551782	0.0606149	0.0213973	0.0178922	0.0183091	0.0213034	0.0147755	0.0246931	0.0522429	0.0433564	0.057275	0.0489888	0.040208	0.123496	0.0188745	0.0309148	0.0238112	0.0232875	0.0152124	0.0146984	0.108588	1.9139	1.14934
LIB	AMDIS	Glucopyranose(-H2O)	4tms	1760	20.8617	217	SUG	x	Glucopyranose(-H2O)$4tms	0.0406654	0.0536311	0.0527589	0.0976021	0.112145	0.114263	0.0372421	0.0291457	0.0328804	0.075119	0.0670274	0.0679099	0.0479864	0.0598185	0.052377	0.119101	0.0966827	0.0919538	0.044393	0.0406629	0.0573409	0.17543	0.146278	0.269047
STD	AMDIS	Glucose	5tms / meox1	1890	22.2419	319	SUG		Glucose$meox1	0.0188768	0.0188415	0.0247845	0.017489	0.0112113	0.0112723	0.046537	0.0343212	0.0571097	0.0266904	0.033669	0.0219526	0.051021	0.034198	0.0388571	0.0207254	0.0131325	0.01358	0.0666881	0.461966	0.0658434	0.0160029	0.058307	0.087308
STD	AMDIS	Glucose	5tms / meox2	1910	22.4459	319	SUG		Glucose$meox2	0.00288357	0.0031303	0.00415784	0.00264186	0.00198146	0.0016445	0.00817915	0.00667491	0.0095435	0.00429995	0.00554332	0.00410475	0.00777721	0.00542389	0.00657149	0.00360006	0.00201124	0.00211501	0.00990853	0.0742044	0.00997009	0.00241277	0.00896052	0.0137179
STD	AMDIS	Glucose	SUM				SUG	x	Glucose$SUM	0.0217604	0.0219718	0.0289423	0.0201308	0.0131927	0.0129168	0.0547162	0.0409961	0.0666532	0.0309903	0.0392123	0.0260574	0.0587982	0.0396219	0.0454286	0.0243254	0.0151437	0.015695	0.0765966	0.53617	0.0758135	0.0184156	0.0672675	0.101026
LIB	AMDIS	Levoglucosan	3tms	1697	20.1605	204	SUG	x	Levoglucosan$3tms	0.024937	0.0294875	0.0318748	0.0271254	0.036872	0.0327276	0.0209757	0.0168205	0.0169242	0.0300876	0.0257989	0.027876	0.027714	0.0329129	0.0336258	0.0352281	0.0249127	0.0243852	0.0206562	0.0229605	0.0226551	0.0285669	0.0335559	0.0767847
STD	AMDIS	Maltose	8tms / meox1	2739	29.5046	160	SUG		Maltose$meox1	0.000383615	0.000629668	0.000573898	0.0100843	0.00079373	0.00122285	0.00109369	0.000301605	0.00548622	0.00229247	0.00200983	0.00446973	0.00712755	0.00782453	0.00722139	0.000380969	0.00061526	0.00122399	0.00226645	0.00218916	0.00164198	0.00187336	0.0112684	0.00458838
STD	AMDIS	Maltose	8tms / meox2	2763	29.7063	160	SUG		Maltose$meox2	0.000479786	0.00088444	0.00061703	0.00239993	0.000779016	0.000834724	0.000509103	0.000744895	0.00183451	0.00088598	0.000823904	0.00193816	0.00211178	0.00214591	0.00186063	0.000676947	0.000470862	0.000360856	0.00138097	0.00104867	0.00120543	0.000678001	0.00241982	0.00141889
STD	MS-Search	Rhamnose	4tms / meox1	1710	20.3161	277	SUG	x	Rhamnose$meox1	0.000937027	0.00091317	0.00115321	0.00121614	0.000829974	0.00120806	0.00613294	0.00400197	0.00398727	0.000791256	0.00100785	0.000687124	0.00137794	0.000551416	0.00109198	0.00127443	0.00156735	0.00158526	0.0029331	0.00336178	0.00579062	0.00203075	0.0042815	0.00167992
STD	MS-Search	Ribose	4tms / meox1	1671	19.8243	307	SUG	x	Ribose$4tms	0.00118734	0.0016711	0.00300091	0.00112059	0.00112567	0.00113563	0.00260834	0.0019479	0.00237669	0.000768259	0.000607408	0.000463736	0.000835333	0.000594218	0.000876794	0.00082847	0.000771213	0.000784512	0.00120853	0.00140638	0.00201052	0.00105405	0.00184734	0.00332898
STD	AMDIS	Sucrose	8tms	2636	28.7465	437	SUG	x	Sucrose$8tms	3.87782	4.58797	4.51775	2.71726	2.74213	2.682	4.02745	3.29575	3.58781	4.8577	4.15955	4.70117	4.41731	4.33621	4.00743	3.73955	2.29213	2.34161	5.71054	6.2758	6.59164	1.92143	2.40568	1.90859
STD	AMDIS	Trehalose	8tms	2739	29.5404	191	SUG	x	Trehalose$8tms	0.0307985	0.0289599	0.0384426	0.726979	0.623897	0.719252	0.0662959	0.0388558	0.0527215	0.654182	0.318288	0.420742	0.00776508	0.00833852	0.0356712	0.771546	0.848471	1.01501	0.0690737	0.0519082	0.0934983	0.875761	1.45218	3.36718
STD	MS-Search	Unknown sugar	-	1677	19.9306	204	SUG	x	Unk(Sug)	0.00821832	0.0118603	0.00968605	0.0981242	0.0945268	0.104573	0.00773638	0.00527695	0.00696848	0.0607534	0.0585398	0.0500058	0.0101507	0.0137215	0.00553123	0.0844579	0.0896822	0.0999592	0.00791471	0.00680992	0.00951939	0.211601	0.158324	0.169333
		Unk(1549/247)		1549	18.4002	247	UNK	x	Unk(1549/247)	0.104342	0.08406	0.0860618	0.0530865	0.0654717	0.214308	0.0864772	0.0822715	0.0771708	0.113614	0.104828	0.095184	0.0509616	0.0617907	0.0590447	0.038301	0.0366242	0.0285199	0.0230668	0.0581439	0.0416042	0.0945859	0.111841	0.0941548
		Unk(1838/123)		1838	21.6778	123	UNK	x	Unk(1838/123)	0.14657	0.164494	0.138802	0.141558	0.130786	0.121597	0.105638	0.0890552	0.105688	0.0587011	0.0662855	0.0577615	0.0973122	0.111656	0.105661	0.135528	0.118149	0.106854	0.0872743	0.0927525	0.115722	0.0818152	0.104458	0.0652068
		Unk(1879/319)		1879	22.1282	319	UNK	x	Unk(1879/319)	0.00380317	0.00330432	0.00439507	0.00779982	0.00403799	0.0075338	0.0149263	0.0113637	0.0137618	0.00515429	0.00447817	0.00305472	0.0048899	0.00391347	0.00416779	0.00733458	0.00579796	0.00559515	0.0133854	0.0186743	0.0152936	0.00587592	0.0128249	0.0086592
		Unk(1918/380)		1918	22.5332	380	UNK	x	Unk(1918/380)	0.0878	0.0819388	0.0989064	0.0601717	0.0724397	0.0688178	0.0514988	0.0387259	0.0409003	0.053865	0.0430255	0.0584493	0.0624929	0.0580984	0.0693916	0.0503637	0.0548165	0.054262	0.0223437	0.0317245	0.0353919	0.0552323	0.0503597	0.0617377
		Unk(1963/375)		1963	22.9766	375	UNK	x	Unk(1963/375)	0.00811134	0.00737254	0.0166085	0.000974663	0.00205279	0.00126388	0.00128288	0.00045273	0.000541949	0.00979202	0.00307233	0.0121429	0.00270434	0.00194645	0.00636028	0.00137553	0.00124143	0.000928713	0.00142745	0.00147835	0.000950787	0.0120169	0.0102018	0.0147133
		Unk(1990/380)		1990	23.2509	380	UNK	x	Unk(1990/380)	0.0340022	0.0334239	0.0344912	0.025326	0.0292653	0.0260585	0.0298565	0.0227124	0.0203879	0.0185016	0.0139261	0.0207096	0.0193756	0.0190178	0.0225051	0.0200536	0.0213042	0.0174552	0.0121769	0.0179297	0.0172261	0.0189853	0.0172124	0.0256869

## Sheet: b)AMDIS
Table S3B: AMDIS identification results and experimental retention indices
The following table provides the net identification scores and experimental retention indices for all compounds identified through batch analysis with the Automated Mass Spectral Deconvolution and Identification System (AMDIS v2.73, http://chemdata.nist.gov/mass-spc/amdis/) (Stein, 1999). Deconvoluted spectra and the corresponding retention indices were matched against a build-in home-made librar…
Library & quantification method information								Net identification scores																								Experimental retention indices
Metabolites	Derivative	RI	RT (min)	m/z	Class	Select	Compounds	CVterr_CTR_R1	CVterr_CTR_R2	CVterr_CTR_R3	CVterr_D/R_R1	CVterr_D/R_R2	CVterr_D/R_R3	EM_CTR_R1	EM_CTR_R2	EM_CTR_R3	EM_D/R_R1	EM_D/R_R2	EM_D/R_R3	DE_CTR_R1	DE_CTR_R2	DE_CTR_R3	DE_D/R_R1	DE_D/R_R2	DE_D/R_R3	CVaqu_CTR_R1	CVaqu_CTR_R2	CVaqu_CTR_R3	CVaqu_D/R_R1	CVaqu_D/R_R2	CVaqu_D/R_R3	CVterr_CTR_R1	CVterr_CTR_R2	CVterr_CTR_R3	CVterr_D/R_R1	CVterr_D/R_R2	CVterr_D/R_R3	EM_CTR_R1	EM_CTR_R2	EM_CTR_R3	EM_D/R_R1	EM_D/R_R2	EM_D/R_R3	DE_CTR_R1	DE_CTR_R2	DE_CTR_R3	DE_D/R_R1	DE_D/R_R2	DE_D/R_R3
Glycolate	2tms	1082	10.9041	147	OA	x	Glycolate$2tms	93	94	94	93	94	93	95	96	95	91	91	94	95	93	95	97	85	92	94	95	93	93	93	92	1081.9	1081.8	1082.1	1082	1081.7	1081.8	1082.1	1082.1	1082.1	1082.2	1081.9	1081.9	1082.1	1082.1	1082	1082.3	1082.2	1081.6
Alanine	2tms	1110	11.4764	116	AA	x	Alanine$2tms	78	79	79	77	80	80	79	79	81	79			80	80	80	80	80	81			75	79	80	81	1110.2	1110	1110.3	1110.1	1109.9	1110	1110.2	1110.1	1110	1110.1			1110.2	1110.2	1110.2	1110.3	1110.2	1109.8
Valine	2tms	1217	13.583	144	AA	x	Valine$2tms	85	90	88	75	76		94	93	93	92		78			78				92	88	86	78	79		1216.9	1216.8	1217	1217	1216.7		1217.1	1217	1217	1216.9		1216.8			1217.1
Phosphate	3tms	1270	14.4767	299	PHOSPHO	x	Phosphate$3tms	90	90	90	90	90	90	90	90	89	90	90	90	90	90	90	90	90	90	88	90	90	91	91	90	1270.2	1270	1270.4	1270.1	1270	1270	1270.2	1270.2	1270.3	1270.2	1270.1	1270	1270.1	1270.2	1270.3	1270.1	1270.2	1270
Leucine	2tms	1272	14.5011	158	AA	x	Leucine$2tms							86	89	90										77	79	81										1271.6	1271.6	1271.7
Glycerol	3tms	1274	14.5405	205	S-OL	x	Glycerol$3tms	93	93	96	93	95	97	96	96	96	96	96	96	96	96	95	96	97	93	94	96	96	93	96	93	1274	1273.9	1274.1	1273.9	1273.7	1273.7	1274	1273.9	1274	1273.9	1273.7	1273.7	1273.9	1273.9	1274.1	1273.9	1273.9	1273.7
Isoleucine	2tms	1292	14.837	158	AA	x	Isoleucine$2tms	91	94	95	80	79		93	93	96	96	88	87	92	88	94	75	77	87	93	96	94	88	88	83	1291.6	1291.5	1291.8	1291.5	1291.3		1291.6	1291.6	1291.7	1291.6	1291.4	1291.4	1291.6	1291.6	1291.7	1291.5	1291.5	1291.3
Proline	2tms	1295	14.8996	142	AA	x	Proline$2tms	94	94	94	94	94	95	94	94	95	94	94	95	93	94	94	94	93	94	94	94	94	94	94	94	1295.4	1295.3	1295.5	1295.2	1295.1	1295.1	1295.4	1295.4	1295.3	1295.3	1295.1	1295.1	1295.3	1295.4	1295.5	1295.3	1295.2	1295.1
Glycine	3tms	1304	15.0431	248	AA	x	Glycine$3tms									77																								1304.5
Succinate	2tms	1312	15.1437	147	OA	x	Succinate$2tms	85	90	88	89	85	87	87	71	73	85	82	84	87	82	81	79	77	80	93	95	92	85	85	95	1311.3	1311.2	1311.4	1311.2	1311	1311	1311.3	1311.3	1311.3	1311.2	1311	1311	1311.2	1311.2	1311.4	1311.1	1311.2	1311
Glycerate	3tms	1328	15.3775	292	OA	x	Glycerate$3tms	84		84	89	83	83		77				80	83	83	81	80	80	78	84	88	81	80	84	97	1327.1		1327.4	1327	1326.6	1326.8		1327.1				1326.8	1327.1	1327.1	1327.2	1326.9	1327.1	1326.9
Uracil	2tms	1334	15.4799	241	OTHER	x	Uracil$3tms	87	86	83		86	85	84	86	86	84	82	84	84	81		85	83		79	87	85	84	86	78	1334	1333.9	1334.3		1333.9	1333.8	1333.9	1334	1333.8	1333.9	1333.9	1333.7	1333.9	1333.8		1333.9	1334
Fumarate	2tms	1349	15.6791	245	OA	x	Fumarate$2tms	89					81													93	91	87		81		1347.7					1347.4
Serine	3tms	1357	15.8208	218	AA	x	Serine$3tms	79	87	78	89	77	82	90	93	92	93	90	89	92	92	91	90	92	91	90	89	85	90	87	88	1357.4	1357.3	1357.7	1357.2	1357	1357.1	1357.3	1357.3	1357.4	1357.3	1357.1	1356.9	1357.3	1357.3	1357.5	1357.2	1357.2	1357.1
Pipecolate	2tms	1363	15.903	156	OA	x	Pipecolate$2tms																		75	72	76		95	89	95																		1362.3
Threonine	3tms	1382	16.1868	218	AA	x	Threonine$3tms	97	97	95	97	96	95	94	95	96	97	93	93	94	97	95	95	95	95	95	94	95	96	94	94	1382.2	1382.1	1382.3	1382	1381.8	1382	1382.2	1382.2	1382.2	1382.1	1381.8	1381.8	1382.1	1382.1	1382.3	1382	1382	1381.9
Malate	3tms	1483	17.5471	233	OA	x	Malate$3tms	94	91	92	89	93	94	95	96	95	95	94	94	94	96	95	94	93	92	93	96	94	92	92	91	1482	1482	1482.3	1481.8	1481.6	1481.7	1481.9	1482	1482	1481.9	1481.7	1481.7	1481.9	1481.9	1482.2	1481.8	1481.9	1481.8
Asparagine (-H2O)	2tms	1496	17.7339	243	AA		Asparagine(-H2O)$2tms	79	78	77	79	79	79	77	77	77	77	77	79	80	79	80	80	80	77				72			1495.9	1495.9	1496.3	1495.7	1495.5	1495.7	1496.1	1496.1	1496.1	1496	1495.7	1495.6	1495.9	1495.9	1496.2	1495.8	1495.9	1495.9
Aspartate	3tms	1514	17.9623	232	AA	x	Aspartate$3tms	81	86	82	86	75	80	80	71	74	72	84	82	71	82	82	82	83	82	89	87	84	77	82	75	1515.4	1515.4	1515.8	1515	1515	1515.1	1514	1513.9	1515.5	1513.7	1513.5	1513.4	1513.8	1513.7	1514	1513.7	1513.8	1513.7
Glutamic acid	pyro	1514	17.9822	156	AA	x	Glutamate$pyro	91	90	93	93	95	95	94	93	93	94	94	95	94	94	94	94	94	94	93	95	96	95	95	96	1515.6	1515.5	1515.8	1515.2	1515	1515.1	1515.8	1515.9	1515.9	1515.7	1515.2	1514.9	1515.5	1515.5	1515.9	1515.6	1515.6	1515.5
4-Hydroxyproline	3tms	1521	18.0519	230	AA	x	4-Hydroxyproline$3tms							77	78	81				87	89	90	91	93	90													1521.4	1521.4	1521.1				1520.9	1520.8	1521.2	1520.8	1520.9	1520.7
GABA	3tms	1527	18.11	174	AA	x	GABA$3tms				75																		80	73	90				1525.6
Threonate	3tms	1553	18.4558	292	OA	x	Threonate$3tms	84	81	81	82			82	79	76	79	72		79	83	83				77					71	1553.6	1553.7	1554.1	1553.7			1553.5	1553.5	1553.6	1553.3	1553.3		1553.6	1553.7	1553.8
2-Oxoglutarate	2tms	1568	18.6293	198	OA	x	2-Oxoglutarate$2tms							81													73	74			84							1567.6
Glutamine (-H2O)	3tms	1585	18.8481	227	AA		Glutamine(-H2O)$3tms	95	94	94	94	93	94	93	92	93	91	95	94	92	93	93	92	93	92		80	87	94	94	90	1585.2	1585.3	1585.6	1585.1	1584.8	1585	1585.3	1585.3	1585.4	1585.1	1584.9	1584.9	1585.2	1585.2	1585.5	1585.1	1585.1	1585
Glutamic acid	3tms	1613	19.18	246	AA		Glutamate$3tms							94	94	93	97																					1612.8	1612.8	1612.9	1612.7
Phenylalanine	2tms	1622	19.2872	218	AA	x	Phenylalanine$2tms	82	87	77				85	86	86				72	70					82	84	81	77	81		1621.8	1621.8	1622.3				1622	1622	1622				1621.7	1621.7
Arginine (unknown derivative)	#1	1635	19.4309	315	AA		Arginine#1 (unknown derivative)	89	88	83	84	86	84	81	76	81	90	80	76				83	82	85							1634.2	1634.3	1634.5	1634	1633.6	1634	1634.4	1634.2	1634.2	1634	1633.7	1633.7				1634	1634	1633.8
Arabinose	4tms / meox1	1656	19.6814	217	SUG	x	Arabinose$meox1						71	74			78	76	78	77	74	80	75	79	80	79	75	77	75	82	78						1655.6	1655.8			1655.6	1655.4	1655.4	1655.6	1655.5	1655.9	1655.5	1655.5	1655.3
Asparagine	3tms	1662	19.7557	231	AA	x	Asparagine$3tms				71			84	83	85	85	84	85	82	84	81	82	83	81										1661.8			1662.1	1662.3	1662.2	1662	1661.8	1661.7	1662.3	1662	1662.4	1661.8	1662	1661.8
Levoglucosan	3tms	1697	20.1605	204	SUG	x	Levoglucosan$3tms	79	82	82	81	88	87		80	76	79		78					70	70	82	86	86	81	85	93	1696.8	1696.8	1697.1	1696.6	1696.3	1696.5		1696.9	1696.9	1696.7		1696.4					1696.6	1696.6
Xylitol	5tms	1700	20.19	217	S-OL	x	Xylitol$5tms													91	92	88	86	85	73																			1699.3	1699.5	1699.7	1699.3	1699.4	1699.4
α-Aminoadipate	3tms	1707	20.2801	260	AA	x	α-Aminoadipate$3tms		80	81				82	82	83	83		76										79		72		1707.3	1708.1				1707.4	1707.6	1707.4	1707.2		1707
Arabitol	5tms	1711	20.349	217	S-OL	x	Arabitol$5tms			76	87	86	84							88	89	89	89	89	89	91	86	88	88	86	84			1713.7	1713.5	1713.2	1713.8							1713.4	1713.4	1713.8	1713.3	1713.4	1713.3
Glycerol-2-Phosphate	4tms	1716	20.3711	299	PHOSPHO	x	Glycerol-2-P$4tms							84	85	87	83		70																			1715.7	1715.7	1715.6	1715.4		1715.3
Ribitol	5tms	1721	20.4094	319	S-OL	x	Ribitol$5tms														75		90	90	89																				1718.9		1718.9	1719	1718.8
Glutamine	4tms	1725	20.4694	227	AA		Glutamine$4tms	82	77					93	94	95	91	77		96	94	93	94	94	94				92	84	91	1724.9	1725.1					1725	1725	1724.9	1724.6	1724.6		1724.8	1724.8	1725.1	1724.5	1724.7	1724.5
Putrescine	4tms	1735	20.5868	174	OTHER	x	Putrescine$4tms	92	94	94	92	88	88									76			72							1735.3	1735.3	1735.6	1735.1	1734.7	1735									1735.5			1734.9
Aconitate	3tms	1740	20.6354	229	OA	x	Aconitate$3tms							75	83	78	76																					1739.8	1739.7	1739.6	1739.4
Glycerol-3-Phosphate	4tms	1752	20.7733	357	PHOSPHO	x	Glycerol-3-P$4tms	93	95	93	95	93	95	95	94	95	94	95	95	95	95	93	93	95	93	93	94	95	95	95	95	1752.3	1752.2	1752.6	1752.1	1751.8	1752	1752.2	1752.2	1752.2	1751.9	1751.8	1751.8	1752.2	1752.2	1752.5	1752	1752.3	1751.9
Glucopyranose(-H2O)	4tms	1760	20.8617	217	SUG	x	Glucopyranose(-H2O)$4tms	84	87	86	83	90	88	91	92	91	93	93	93	75			85	82	84	94	94	93	93	93	93	1760.2	1760.1	1760.6	1760.1	1759.7	1760.1	1760.3	1760.3	1760.2	1759.9	1759.8	1759.8	1760.1			1760.1	1760	1760.1
Glutamine	3tms	1766	20.9221	156	AA	x	Glutamine$3tms	89	87	75	86	81	76	89	84	88	89	82	87	88	88	88	87	88	87				87	86	82	1765.7	1765.8	1766	1765.5	1765	1765.3	1765.7	1765.7	1765.7	1765.3	1765.2	1765.2	1765.6	1765.5	1765.8	1765.3	1765.3	1765.3
Citrate	4tms	1811	21.4077	273	OA	x	Citrate$4tms	79		84	92	90	92	100	100	98	98	99	98	97	97	98	98	98	97	90	93	94	98	97	96	1811		1810.8	1810.1	1809.6	1810.1	1810.1	1810.1	1810	1809.8	1809.8	1809.6	1810.3	1810.2	1810.4	1809.9	1809.9	1809.8
Arginine | Ornithine	#2 (4tms)	1811	21.4204	174	AA	x	Arginine#2 (Ornithine$4tms)	92	91	92	91	89	91	78		81	86	81	83								71		80	74	76	1811.5	1811.5	1811.9	1811.2	1810.8	1811.1	1811.4		1811.3	1811.2	1810.9	1810.9
Arginine | Citrulline	#3 (3tms)	1817	21.477	256	AA		Arginine#3 (Citrulline$3tms)	84	86	84	81	82	83	78	80	76	83	71	76						71							1816.8	1816.9	1817.3	1816.8	1816.3	1816.7	1816.9	1816.9	1816.8	1816.6	1816.4	1816.3						1816.5
Dehydroascorbate-Dimer	meox2-dimer	1840	21.7234	316	OA	x	DHA-dimer$2meox	90	90	90	88	90	89	93	94	94	92	88	90	95	93	94	93	92	91	94	94	93	83	80		1840.4	1840.4	1840.8	1840.2	1839.8	1840.1	1840.3	1840.5	1840.3	1840.1	1839.9	1839.8	1840.3	1840.2	1840.5	1839.9	1840.1	1839.9
Fructose	5tms / meox1	1865	21.9768	217	SUG		Fructose$meox1	89	79	90	94	93	93	81	76	78	71	72		91	89	91	90	94	88	90	92	92	90	94	93	1864.6	1864.6	1865.7	1864.3	1863.9	1864.4	1864.6	1864.8	1864.6	1864.3	1864.2		1864.4	1864.4	1864.6	1864	1864	1864
Dehydroascorbate	3tms	1867	22.0005	316	OA		Dehydroascorbate$3tms			76	84						72		79			70	81	86	84	77	78	73						1867.2	1866.7						1866.4		1866.3			1866.8	1866.4	1866.5	1866.3
Fructose	5tms / meox2	1874	22.0755	217	SUG		Fructose$meox2	76	71	78	89	87	87							92	91	91	91	91	92	90	91	88	80	87	85	1873.8	1874.2	1874.4	1873.6	1873.3	1873.7							1873.6	1873.5	1873.8	1873.3	1873.3	1873.1
Allantoin	1tms	1877	22.1086	331	OTHER	x	Allantoin$1tms			81				82	85	85	79	78																1877.3				1876.7	1876.8	1876.7	1876.4	1876.3
Galactose	5tms / meox1	1884	22.1806	319	SUG	x	Galactose$meox1	89	87	87	93	93	93	71	85	71	91	88	90	93	92	93	95	99	94	87	92	90	89	95	96	1884	1883.9	1884.1	1889.6	1889.1	1889.6	1883.9	1890	1883.9	1889.4	1889.4	1889.2	1889.5	1889.5	1889.7	1889.1	1889.2	1889
Glucose	5tms / meox1	1890	22.2419	319	SUG		Glucose$meox1	82	84	86				88	85	81								77		90		90	87			1889.7	1889.9	1890.2				1889.9	1890	1889.9								1889.2
Glucose	5tms / meox2	1910	22.4459	319	SUG		Glucose$meox2				85	81	81									80	84	94	81	74	82	81	72	83	89				1909.6	1908.9	1909.5									1910.1	1909.2	1909.2	1908.9
Lysine	4tms	1915	22.506	156	AA	x	Lysine$4tms	77		73		72		76	76	75	73															1915.7		1916		1915.1		1915.8	1915.9	1915.7	1915.3
Mannitol	6tms	1924	22.5919	319	S-OL	x	Mannitol$6tms	84	81	88	81	78	82		73	73	79	76	75	75	75	78	77	77	76	85	83	85	82	78	79	1924.5	1924.6	1924.9	1924.1	1923.7	1924.1		1924.8	1924.5	1924.1	1924	1923.8	1930.9	1931.7	1924.3	1923.6	1923.6	1931.7
myo-inositol	6tms	2089	24.1724	217	S-OL	x	myo-inositol$6tms	96	97	96	99	97	97	97	100	99	96	96	98	97	97	97	97	99	97	97	97	97	97	97	98	2088.3	2088.3	2088.8	2088.2	2087.7	2088	2088.3	2088.4	2088.3	2088	2087.9	2087.9	2088	2087.9	2088.2	2087.7	2087.8	2087.6
Phytol	1tms	2168	24.9188	143	APO	x	Phytol$1tms	84	83	84	79	77	77	84	82	82	81	78	79	81	81	82	81	81	79	82	81	81	80	79	74	2168.2	2168.2	2168.6	2168	2167.6	2167.8	2168.2	2168.3	2168.1	2167.9	2167.8	2167.7	2168.3	2168.1	2168.5	2167.8	2167.9	2167.6
bis-glycerol-Phosphate	5tms	2182	25.0469	357	PHOSPHO	x	bis-glycerol-P$5tms	87	87	88	87	87	87	87	87	87	87	87	88	87	87	87	86	87	86	87	86	86	87	88	87	2182.1	2182	2182.5	2181.8	2181.3	2181.7	2182.1	2182.2	2181.9	2181.7	2181.6	2181.5	2182.1	2182	2182.2	2181.7	2181.7	2181.6
C18:2 (Linoleic acid)	1tms	2205	25.2598	337	FA	x	C18:2$1tms	91	88	89	87	88	91	84	81	84		85	82	86	72	78	74	82	81	94	90	88	87	91	95	2205.2	2205.1	2205.7	2205	2204.5	2204.9	2205.1	2205.4	2205		2204.7	2204.4	2205.2	2205.1	2205.5	2204.8	2204.9	2204.7
C18:1 (Oleic acid)	1tms	2212	25.3119	339	FA	x	C18:1a$1tms	79		75	85	86	83		83	86	89	73	75		79		86	85	84	85	81	84	85	87	85	2218.1		2218.4	2217.8	2217.2	2217.6		2218.2	2218	2217.7	2211.2	2211		2218		2217.7	2217.7	2217.6
Volemitol	5tms	2211	25.3128	319	S-OL	x	Volemitol$5tms													83	82	83	82	77	78																			2208.9	2208.8	2209	2208.6	2208.4	2208.3
C18:1 (Oleic acid isomer)	1tms	2218	25.3697	339	FA	x	C18:1b$1tms	79	82	76	75		80	88	85		86	88	92	84	82	84	87	82	81	87	84	84			91	2218.3	2218.1	2218.4	2217.8		2217.7	2218.1	2218.2		2217.7	2217.6	2217.6	2218.1	2217.9	2218.4	2217.7	2217.7	2217.6
Fructose-6-Phosphate	6tms / meox1	2298	26.0537	315	PHOSPHO	x	Fructose-6-P$meox1																						79	73	92
Glucose-6-Phosphate	6tms / meox1	2310	26.1628	387	PHOSPHO		Glucose-6-P$meox1				73	77	75	70	74	72	71			76	71		79	78	76	79	78	73	86	82	88				2310	2309.6	2310.1	2310.2	2310.6	2310	2309.8			2310.3	2310.3		2309.9	2310.1	2309.9
Glucose-6-Phosphate	6tms / meox2	2330	26.3349	387	PHOSPHO		Glucose-6-P$meox2																						78	82	88
Myo-inositol-1-Phosphate	7tms	2408	26.9934	318	PHOSPHO	x	Myo-inositol-1P$7tms	81	81	82	79	75	76	81	82	79	79	75	77	80	80	83	79	78	76	84	81	81	80	75	75	2407.9	2407.7	2407.9	2407.5	2406.9	2407.1	2407.8	2407.8	2407.5	2407.4	2407	2407.2	2407.6	2407.6	2408	2407.4	2407.3	2407.1
Sucrose	8tms	2636	28.7465	437	SUG	x	Sucrose$8tms	91	87	91	94	96	96	91	96	87	97	85	88	91	91	89	97	96	98	99	93	99	88	86	84	2635.1	2636.1	2636.7	2636.2	2635.5	2635.9	2636.3	2636.1	2635.7	2636.6	2635.8	2638	2636.5	2636.1	2636	2636.2	2635.9	2636.1
Maltose	8tms / meox1	2739	29.5046	160	SUG		Maltose$meox1	76	73	78	86	84	85	84	85	85	84	84	84	78	80	87	81	81	83	85	85	84	84	84	83	2739.6	2739.5	2739.8	2734.8	2734.4	2734.7	2739.5	2739.9	2739.5	2739.1	2738.6	2738.8	2739.5	2739.5	2735.4	2739.1	2739	2738.9
Trehalose	8tms	2739	29.5404	191	SUG	x	Trehalose$8tms	79	76		82	79	77															72				2746.5	2745.8		2746	2745.5	2745.8
Maltose	8tms / meox2	2763	29.7063	160	SUG		Maltose$meox2				82	78	81	86								82						73		79					2761.1	2760.5	2761.2	2761.3								2761.6
Alpha-Tocopherol	1tms	3143	32.3115	502	APO	x	Alpha-Tocopherol$tms	93	93	95	92	81	91	92	98	95	93	86	91	90	90	94	90	89	89	97	96	91	91	88	88	3142.8	3142.9	3143.2	3142.9	3141.5	3142.5	3142.9	3143.4	3143.1	3142.7	3142.2	3142.6	3142.7	3142.9	3143.3	3142.5	3142.3	3142.4
Trehalose-6-Phosphate	9tms	3174	32.5221	315	PHOSPHO	x	Trehalose-6P$9tms				75	70		94	93	94	94	93	97									83	100	94	97				3174	3173.5		3174.7	3174.9	3174.6	3174.6	3173.8	3174.2
Campesterol	1tms	3261	33.1301	382	APO	x	Campesterol$1tms							84	84	84	83	83	84	84	85	85	85	84	84													3261.3	3261.9	3261.5	3261.3	3260.7	3260.9	3261.4	3261.2	3261.7	3261	3261	3260.6
[truncated: 6 more columns]

## Sheet: c)Experimental_RT
Table S3C: Experiment retention times for all peaks integrated with Xcalibur
Library & quantification method information							Experimental retention times (min)
Metabolites	Derivatization	RI	RT (min)	m/z	Class	Compounds	CVterr_CTR_R1	CVterr_CTR_R2	CVterr_CTR_R3	EM_CTR_R1	EM_CTR_R2	EM_CTR_R3	DE_CTR_R1	DE_CTR_R2	DE_CTR_R3	CVaqu_CTR_R1	CVaqu_CTR_R2	CVaqu_CTR_R3	CVterr_D/R_R1	CVterr_D/R_R2	CVterr_D/R_R3	EM_D/R_R1	EM_D/R_R2	EM_D/R_R3	DE_D/R_R1	DE_D/R_R2	DE_D/R_R3	CVaqu_D/R_R1	CVaqu_D/R_R2	CVaqu_D/R_R3
Glycolate	2tms	1082	10.9041	147	OA	Glycolate$2tms	10.9036	10.902	10.9068	10.9089	10.906	10.907	10.9094	10.9058	10.9062	10.9093	10.9059	10.9023	10.9058	10.9003	10.9008	10.9084	10.9055	10.9022	10.9125	10.9093	10.8988	10.907	10.9059	10.8995
Alanine	2tms	1110	11.4764	116	AA	Alanine$2tms	11.4784	11.4734	11.4816	11.4769	11.4774	11.4785	11.4808	11.4806	11.4776	11.4807	11.4773	11.4772	11.4772	11.4718	11.4756	11.4764	11.4735	11.4737	11.4805	11.4773	11.4702	11.4784	11.4739	11.4709
Urea	3tms	1184	12.9767	171	OTHER	Urea$3tms	12.9785	12.9769	12.9817	12.977	12.9775	12.9785	12.9775	12.9773	12.9777	12.9807	12.9774	12.9738	12.9772	12.9718	12.9722	12.9765	12.9735	12.9737	12.9771	12.9773	12.9702	12.9785	12.9773	12.9744
Valine	2tms	1217	13.583	144	AA	Valine$2tms	13.5839	13.5823	13.5871	13.5858	13.5863	13.5873	13.5829	13.5861	13.5865	13.5862	13.5828	13.5826	13.5827	13.5806	13.5811	13.5853	13.579	13.5791	13.5826	13.5828	13.5791	13.5839	13.5828	13.5798
13C5,15N-Valine	2tms	1217	13.58	149	IS	13C5,15N-Valine$2tms	13.5805	13.5789	13.5837	13.5824	13.5829	13.5839	13.5795	13.5827	13.5831	13.5862	13.5828	13.5792	13.5793	13.5772	13.5777	13.5819	13.5756	13.5757	13.5792	13.5794	13.5791	13.5805	13.5794	13.5764
Phosphate	3tms	1270	14.4767	299	PHOSPHO	Phosphate$3tms	14.4785	14.4769	14.4783	14.477	14.4775	14.4785	14.4775	14.4773	14.4777	14.4808	14.4774	14.4772	14.4773	14.4718	14.4756	14.4799	14.4736	14.4737	14.4772	14.4774	14.4736	14.4785	14.4739	14.4744
Leucine	2tms	1272	14.5011	158	AA	Leucine$2tms	14.5023	14.5007	14.5055	14.5042	14.5013	14.5023	14.5013	14.5011	14.5049	14.5046	14.5012	14.501	14.5011	14.4956	14.4995	14.5037	14.4974	14.4975	14.501	14.5012	14.4975	14.5057	14.4977	14.4982
Glycerol	3tms	1274	14.5405	205	S-OL	Glycerol$3tms	14.5431	14.5415	14.5429	14.5416	14.5421	14.5431	14.5421	14.5419	14.5423	14.5454	14.542	14.5418	14.5385	14.5364	14.5369	14.5411	14.5382	14.5383	14.5384	14.5386	14.5383	14.5431	14.5386	14.5356
Isoleucine	2tms	1292	14.837	158	AA	Isoleucine$2tms	14.839	14.8374	14.8422	14.8375	14.838	14.8391	14.838	14.8378	14.8382	14.8413	14.8379	14.8378	14.8378	14.8324	14.8328	14.837	14.8341	14.8343	14.8377	14.8345	14.8342	14.839	14.8345	14.8315
Proline	2tms	1295	14.8996	142	AA	Proline$2tms	14.9003	14.8987	14.9035	14.9022	14.9027	14.9003	14.8993	14.8991	14.9029	14.9025	14.9026	14.899	14.899	14.897	14.8974	14.9017	14.8953	14.8955	14.8989	14.8991	14.8988	14.9003	14.8991	14.8962
Glycine	3tms	1304	15.0431	248	AA	Glycine$3tms	15.0431	15.0415	15.0463	15.045	15.0455	15.0465	15.0421	15.0419	15.0457	15.0454	15.0454	15.0452	15.0419	15.0399	15.0403	15.0445	15.0382	15.0383	15.0418	15.042	15.0383	15.0465	15.042	15.039
Succinate	2tms	1312	15.1437	147	OA	Succinate$2tms	15.1452	15.1436	15.1484	15.1437	15.1442	15.1452	15.1442	15.144	15.1478	15.1474	15.1441	15.1439	15.1439	15.1419	15.1389	15.1432	15.1402	15.1404	15.1438	15.1441	15.1403	15.1452	15.1406	15.1411
Glycerate	3tms	1328	15.3775	292	OA	Glycerate$3tms	15.3765	15.3783	15.3797	15.3784	15.3755	15.3799	15.3789	15.3753	15.3791	15.3821	15.3788	15.3786	15.3786	15.3732	15.3736	15.3745	15.3681	15.3717	15.3785	15.3719	15.375	15.3799	15.3753	15.3758
Uracil	2tms	1334	15.4799	241	OTHER	Uracil$3tms	15.4785	15.4769	15.4817	15.4804	15.4809	15.4785	15.4775	15.4739	15.4811	15.4842	15.4808	15.4806	15.4807	15.4786	15.4757	15.4765	15.477	15.4737	15.4772	15.4774	15.4771	15.4819	15.4808	15.4778
Fumarate	2tms	1349	15.6791	245	OA	Fumarate$2tms	15.6792	15.6776	15.6824	15.6811	15.6816	15.6792	15.6816	15.678	15.6852	15.6849	15.6815	15.6779	15.678	15.6759	15.6763	15.6772	15.6743	15.6744	15.6779	15.6815	15.6743	15.6826	15.678	15.6751
Serine	3tms	1357	15.8208	218	AA	Serine$3tms	15.8221	15.8205	15.8252	15.8239	15.8211	15.8221	15.821	15.8209	15.8247	15.8243	15.8209	15.8208	15.8208	15.8188	15.8192	15.82	15.8171	15.8173	15.8207	15.8175	15.8172	15.822	15.8175	15.8179
Alanine	3tms	1357	15.8248	262	AA	Alanine$3tms	15.8255	15.8239	15.8286	15.8273	15.8245	15.8255	15.8244	15.8243	15.8281	15.8311	15.8278	15.8242	15.8242	15.8222	15.8226	15.8234	15.8205	15.8207	15.8241	15.8209	15.8206	15.8254	15.8209	15.8214
Pipecolate	2tms	1363	15.903	156	OA	Pipecolate$2tms	15.9105	15.9021	15.9069	15.9022	15.9027	15.9037	15.8993	15.8991	15.9063	15.906	15.9026	15.9024	15.9025	15.9004	15.9008	15.9017	15.8988	15.8955	15.9024	15.8992	15.8954	15.9037	15.8991	15.8996
Threonine	3tms	1382	16.1868	218	AA	Threonine$3tms	16.1894	16.1844	16.1892	16.1879	16.1884	16.1894	16.1884	16.1882	16.192	16.1917	16.1883	16.1881	16.1848	16.1827	16.1832	16.1874	16.1845	16.1846	16.1847	16.1849	16.1846	16.1894	16.1848	16.1853
Malate	3tms	1483	17.5471	233	OA	Malate$3tms	17.5466	17.5484	17.5532	17.5485	17.549	17.55	17.549	17.5454	17.5492	17.5488	17.5489	17.5487	17.5453	17.5433	17.5437	17.548	17.545	17.5418	17.5452	17.5454	17.5451	17.55	17.5454	17.5425
Asparagine (-H2O)	2tms	1496	17.7339	243	AA	Asparagine(-H2O)$2tms	17.7336	17.7354	17.7368	17.7355	17.736	17.7371	17.736	17.7325	17.7396	17.7359	17.7359	17.7358	17.7324	17.7304	17.7308	17.735	17.7321	17.7289	17.7323	17.7325	17.7322	17.737	17.7325	17.7295
Methionine	2tms	1514	17.9598	176	AA	Methionine$2tms	17.9615	17.9599	17.9613	17.9634	17.9639	17.9616	17.9605	17.9603	17.9641	17.9638	17.9638	17.9603	17.9569	17.9549	17.9587	17.9595	17.9566	17.9568	17.9568	17.9604	17.9567	17.9615	17.957	17.9574
Aspartate	3tms	1514	17.9623	232	AA	Aspartate$3tms	17.9615	17.9633	17.9681	17.9634	17.9605	17.965	17.9605	17.9603	17.9641	17.9638	17.9638	17.9637	17.9603	17.9583	17.9587	17.9595	17.9566	17.9568	17.9602	17.9604	17.9601	17.9649	17.9604	17.9608
Glutamic acid	pyro	1514	17.9822	156	AA	Glutamate$pyro	17.9819	17.9838	17.9885	17.9872	17.9878	17.9888	17.9843	17.9842	17.988	17.9842	17.9842	17.9841	17.9807	17.9787	17.9791	17.9868	17.9804	17.9772	17.984	17.9842	17.9839	17.9853	17.9774	17.9779
4-Hydroxyproline	3tms	1521	18.0519	230	AA	4-Hydroxyproline$3tms	18.0568	18.0484	18.0566	18.0519	18.0524	18.05	18.049	18.0488	18.0526	18.0556	18.0523	18.0555	18.0522	18.0467	18.0505	18.048	18.0485	18.0452	18.0487	18.0489	18.0451	18.0534	18.0488	18.0459
GABA	3tms	1527	18.11	174	AA	GABA$3tms	18.1146	18.1096	18.1144	18.1097	18.1136	18.1146	18.117	18.1032	18.1138	18.1169	18.1135	18.1099	18.1066	18.1045	18.1016	18.1092	18.1029	18.103	18.1065	18.1101	18.1064	18.1112	18.11	18.1071
Threonate	3tms	1553	18.4558	292	OA	Threonate$3tms	18.4547	18.4599	18.4579	18.4566	18.4537	18.4548	18.4537	18.4535	18.4573	18.4604	18.4536	18.4569	18.4535	18.4515	18.4553	18.4527	18.4532	18.45	18.4534	18.4536	18.4533	18.4581	18.4536	18.454
2-Oxoglutarate	2tms	1568	18.6293	198	OA	2-Oxoglutarate$2tms	18.6282	18.63	18.6348	18.6301	18.6306	18.6282	18.6272	18.6304	18.6308	18.6339	18.6305	18.6303	18.627	18.6249	18.6254	18.6262	18.6233	18.6234	18.6269	18.6305	18.6268	18.6316	18.6271	18.6275
Serine	4tms	1568	18.6349	276	AA	Serine$4tms	18.635	18.6334	18.6416	18.6335	18.634	18.635	18.634	18.6338	18.6376	18.6373	18.6339	18.6371	18.6338	18.6318	18.6322	18.633	18.6301	18.6302	18.6337	18.6339	18.6302	18.6384	18.6339	18.6309
Glutamine (-H2O)	3tms	1585	18.8481	227	AA	Glutamine(-H2O)$3tms	18.8493	18.8511	18.8525	18.8478	18.8483	18.8527	18.8483	18.8481	18.8519	18.85	18.8482	18.8514	18.8481	18.8426	18.8465	18.8473	18.8444	18.8445	18.848	18.8482	18.8479	18.8493	18.8448	18.8452
Glutamic acid	3tms	1613	19.18	246	AA	Glutamate$3tms	19.17	19.18	19.19	19.18	19.18	19.18	19.18	19.18	19.19	19.19	19.18	19.19	19.18	19.18	19.18	19.18	19.19	19.19	19.18	19.18	19.17	19.18	19.18	19.18
Phenylalanine	2tms	1622	19.2872	218	AA	Phenylalanine$2tms	19.2881	19.2865	19.2913	19.29	19.2905	19.2881	19.2871	19.2869	19.2907	19.2904	19.287	19.2868	19.2869	19.2848	19.2853	19.2827	19.2832	19.2833	19.2834	19.287	19.2832	19.2915	19.2835	19.284
Arginine (unknown derivative)	#1	1635	19.4309	315	AA	Arginine#1 (unknown derivative)	19.4309	19.4294	19.4341	19.4328	19.4334	19.431	19.4333	19.4332	19.4336	19.4366	19.4333	19.4331	19.4297	19.4243	19.4281	19.429	19.4294	19.4262	19.4296	19.4264	19.4261	19.4344	19.4264	19.4303
Arabinose	4tms / meox1	1656	19.6814	217	SUG	Arabinose$meox1	19.6827	19.6845	19.6858	19.6845	19.6817	19.6827	19.6816	19.6815	19.6853	19.6849	19.6816	19.6848	19.678	19.676	19.6798	19.6807	19.6777	19.6779	19.6813	19.6815	19.6778	19.6827	19.6781	19.6786
Asparagine	3tms	1662	19.7557	231	AA	Asparagine$3tms	19.7541	19.7593	19.7607	19.7594	19.7599	19.7575	19.7531	19.7563	19.7601	19.7598	19.7598	19.746	19.7563	19.7508	19.758	19.7555	19.756	19.7527	19.7562	19.7564	19.7526	19.7575	19.7529	19.7534
Ribose	4tms / meox1	1671	19.8243	307	SUG	Ribose$4tms	19.8595	19.8545	19.8593	19.858	19.8551	19.8561	19.8517	19.8515	19.8587	19.855	19.8618	19.8548	19.8549	19.8461	19.8601	19.8473	19.8478	19.8513	19.8548	19.8482	19.8513	19.8561	19.8516	19.852
Unknown sugar	-	1677	19.9306	204	SUG	Unk(Sug)	19.9344	19.9328	19.9376	19.9328	19.9334	19.931	19.93	19.9298	19.9336	19.9366	19.9299	19.9297	19.9297	19.9243	19.9247	19.929	19.9294	19.9262	19.9262	19.9298	19.9295	19.9344	19.9264	19.9269
Levoglucosan	3tms	1697	20.1605	204	SUG	Levoglucosan$3tms	20.1623	20.1607	20.1654	20.1607	20.1613	20.1589	20.1612	20.1611	20.1615	20.1645	20.1612	20.161	20.161	20.1556	20.156	20.1569	20.1539	20.1541	20.1575	20.1577	20.1574	20.1623	20.1577	20.1582
Xylitol	5tms	1700	20.19	217	S-OL	Xylitol$5tms	20.19	20.19	20.2029	20.19	20.19	20.19	20.1919	20.1917	20.1955	20.19	20.19	20.19	20.19	20.19	20.19	20.19	20.19	20.19	20.1915	20.1952	20.1914	20.19	20.2087	20.19
α-Aminoadipate	3tms	1707	20.2801	260	AA	α-Aminoadipate$3tms	20.2813	20.2797	20.2845	20.2832	20.2803	20.2813	20.2837	20.2801	20.2839	20.2836	20.2836	20.28	20.2801	20.2746	20.2785	20.2759	20.2798	20.2765	20.2732	20.2768	20.2765	20.2813	20.2767	20.2772
Rhamnose	4tms / meox1	1710	20.3161	277	SUG	Rhamnose$meox1	20.3187	20.3103	20.3185	20.3138	20.3177	20.3153	20.3177	20.3141	20.3145	20.3142	20.321	20.314	20.3141	20.3121	20.3193	20.3099	20.3138	20.3105	20.314	20.3108	20.3105	20.3221	20.3142	20.3146
Arabitol	5tms	1711	20.349	217	S-OL	Arabitol$5tms	20.3527	20.3477	20.3525	20.3478	20.3483	20.346	20.3449	20.3481	20.3519	20.355	20.3482	20.3515	20.3481	20.3427	20.3465	20.3473	20.3444	20.3445	20.3446	20.3482	20.3479	20.3493	20.3482	20.3452
Glycerol-2-Phosphate	4tms	1716	20.3711	299	PHOSPHO	Glycerol-2-P$4tms	20.3731	20.3715	20.3729	20.3716	20.3687	20.3698	20.3721	20.3685	20.3723	20.3754	20.372	20.3753	20.3685	20.3665	20.3703	20.3677	20.3682	20.365	20.365	20.3686	20.3649	20.3731	20.3686	20.3656
Ribitol	5tms	1721	20.4094	319	S-OL	Ribitol$5tms	20.414	20.4056	20.4104	20.409	20.4096	20.4038	20.4062	20.406	20.4132	20.4128	20.4095	20.4127	20.4059	20.4073	20.4077	20.4052	20.4056	20.4058	20.4058	20.406	20.4057	20.414	20.4094	20.4031
Glutamine	4tms	1725	20.4694	227	AA	Glutamine$4tms	20.4752	20.4736	20.4784	20.4771	20.4742	20.4752	20.4742	20.474	20.4778	20.4332	20.4673	20.4773	20.474	20.4719	20.4655	20.4698	20.4703	20.4704	20.4705	20.4707	20.4703	20.4752	20.4706	20.4711
Aspartate	4tms	1725	20.4765	205	AA	Aspartate$4tms	20.4786	20.477	20.4818	20.4771	20.4776	20.4752	20.4742	20.474	20.4778	20.4809	20.4775	20.4773	20.474	20.4719	20.4757	20.4732	20.4703	20.4704	20.4705	20.4707	20.4703	20.4786	20.474	20.4711
Putrescine	4tms	1735	20.5868	174	OTHER	Putrescine$4tms	20.5908	20.5892	20.5906	20.5893	20.5898	20.5909	20.5864	20.5862	20.59	20.5897	20.5863	20.5896	20.5862	20.5808	20.5846	20.5854	20.5825	20.5826	20.5861	20.5863	20.5826	20.5874	20.5829	20.5833
Aconitate	3tms	1740	20.6354	229	OA	Aconitate$3tms	20.635	20.6335	20.6416	20.6369	20.6375	20.6385	20.6374	20.6339	20.6308	20.64	20.6408	20.6372	20.6406	20.6318	20.6288	20.6331	20.6369	20.6337	20.6303	20.6305	20.6336	20.6351	20.6339	20.631
Glycerol-3-Phosphate	4tms	1752	20.7733	357	PHOSPHO	Glycerol-3-P$4tms	20.7745	20.7763	20.7777	20.773	20.7769	20.7711	20.7735	20.7767	20.7771	20.7768	20.7734	20.7732	20.7733	20.7678	20.7717	20.7691	20.7696	20.7697	20.7698	20.77	20.7697	20.7745	20.77	20.7704
Glucopyranose(-H2O)	4tms	1760	20.8617	217	SUG	Glucopyranose(-H2O)$4tms	20.8629	20.8647	20.8661	20.8648	20.8619	20.863	20.8619	20.8618	20.8655	20.8652	20.8618	20.8617	20.8617	20.8563	20.8601	20.8609	20.858	20.8582	20.8582	20.8618	20.8581	20.8629	20.8584	20.8589
Glutamine	3tms	1766	20.9221	156	AA	Glutamine$3tms	20.9242	20.9226	20.9274	20.9227	20.9232	20.9208	20.9232	20.923	20.9268	20.9264	20.9197	20.9229	20.9196	20.9175	20.9213	20.9188	20.9193	20.9194	20.9194	20.9197	20.9193	20.9242	20.9196	20.9201
Citrate	4tms	1811	21.4077	273	OA	Citrate$4tms	21.4072	21.4124	21.4138	21.4091	21.4062	21.4072	21.4062	21.406	21.4098	21.4128	21.4095	21.4093	21.406	21.4005	21.4077	21.4018	21.4023	21.4024	21.4059	21.4061	21.4023	21.4072	21.4026	21.4031
Arginine | Ornithine	#2 (4tms)	1811	21.4204	174	AA	Arginine#2 (Ornithine$4tms)	21.4208	21.4226	21.424	21.4227	21.4232	21.4208	21.4198	21.4196	21.4234	21.4264	21.4231	21.4229	21.4196	21.4141	21.4179	21.4188	21.4159	21.416	21.4161	21.4197	21.4159	21.4208	21.4162	21.4167
Arginine | Citrulline	#3 (3tms)	1817	21.477	256	AA	Arginine#3 (Citrulline$3tms)	21.4786	21.4804	21.4818	21.4805	21.4776	21.4786	21.4776	21.474	21.4812	21.47	21.48	21.48	21.474	21.4719	21.4758	21.4766	21.4703	21.4738	21.4739	21.4775	21.4738	21.4786	21.474	21.4779
Dehydroascorbate-Dimer	meox2-dimer	1840	21.7234	316	OA	DHA-dimer$2meox	21.7235	21.7253	21.7301	21.722	21.7259	21.7235	21.7225	21.7223	21.7261	21.7292	21.7258	21.7256	21.7223	21.7202	21.7207	21.7215	21.7186	21.7153	21.7188	21.7224	21.7187	21.7235	21.7189	21.716
C14:0 (Myristic acid)	1tms	1844	21.7555	285	FA	C14:0$1tms	21.7541	21.7559	21.7607	21.756	21.7599	21.7575	21.7531	21.7529	21.7601	21.7598	21.7564	21.7562	21.7529	21.7509	21.7547	21.7521	21.7526	21.7527	21.7528	21.7564	21.7527	21.7575	21.753	21.7534
Adenine	2tms	1862	21.9544	264	OTHER	Adenine$2tms	21.9548	21.9566	21.9614	21.9567	21.9572	21.9548	21.9538	21.9536	21.9574	21.9571	21.9571	21.9535	21.9536	21.9481	21.952	21.9528	21.9533	21.95	21.9501	21.9537	21.95	21.9548	21.9536	21.9507
Fructose	5tms / meox1	1865	21.9768	217	SUG	Fructose$meox1	21.9786	21.977	21.9818	21.9805	21.9776	21.9786	21.9776	21.9774	21.9778	21.9809	21.9775	21.9807	21.974	21.9719	21.9758	21.9766	21.9737	21.9738	21.9705	21.9707	21.9704	21.9786	21.974	21.9711
Dehydroascorbate	3tms	1867	22.0005	316	OA	Dehydroascorbate$3tms	22.0024	22.0042	22.0056	22.0009	22.0014	22.0024	22.0014	22.0012	22.0016	22.0047	22.0013	22.0045	22.0012	21.9958	21.9996	21.997	21.9975	21.9976	21.9977	21.9979	21.9976	22.0024	21.9945	22.0391
Fructose	5tms / meox2	1874	22.0755	217	SUG	Fructose$meox2	22.0772	22.0756	22.0838	22.0757	22.0797	22.0807	22.0728	22.0727	22.0764	22.0795	22.0761	22.0794	22.076	22.0672	22.0744	22.0753	22.0723	22.0725	22.0691	22.0693	22.069	22.0773	22.0693	22.0698
Allantoin	1tms	1877	22.1086	331	OTHER	Allantoin$1tms	22.1079	22.1097	22.1145	22.1097	22.1103	22.1113	22.1171	22.1169	22.1173	22.1067	22.1068	22.1066	22.1066	22.1012	22.1152	22.1059	22.0995	22.1031	22.1065	22.1102	22.1064	22.1079	22.1169	22.1038
Galactose	5tms / meox1	1884	22.1806	319	SUG	Galactose$meox1	22.1827	22.1811	22.1859	22.1812	22.1851	22.1827	22.1783	22.1781	22.1785	22.185	22.1782	22.1848	22.1781	22.1726	22.1799	22.1773	22.1812	22.1779	22.178	22.1782	22.1744	22.1827	22.1781	22.1786
Glucose	5tms / meox1	1890	22.2419	319	SUG	Glucose$meox1	22.2405	22.2457	22.2471	22.2458	22.2429	22.2405	22.2395	22.2393	22.2431	22.2462	22.2428	22.246	22.2393	22.2373	22.2411	22.2419	22.239	22.2357	22.2358	22.236	22.2357	22.2439	22.236	22.2364
Glucose	5tms / meox2	1910	22.4459	319	SUG	Glucose$meox2	22.448	22.4498	22.4512	22.4499	22.4538	22.4446	22.4436	22.4468	22.4472	22.4503	22.4469	22.4501	22.4434	22.4379	22.4418	22.446	22.4397	22.4398	22.4433	22.4401	22.4398	22.448	22.44	22.4439
Lysine	4tms	1915	22.506	156	AA	Lysine$4tms	22.5058	22.5076	22.5124	22.5077	22.5082	22.5059	22.5082	22.508	22.5084	22.5115	22.5081	22.5114	22.5046	22.4992	22.503	22.5038	22.5009	22.501	22.5045	22.5047	22.501	22.5058	22.5013	22.5017
Mannitol	6tms	1924	22.5919	319	S-OL	Mannitol$6tms	22.5943	22.5927	22.5975	22.5927	22.5967	22.5909	22.5933	22.5897	22.5935	22.5965	22.5932	22.593	22.5896	22.5876	22.5914	22.5923	22.5894	22.5861	22.5861	22.5863	22.586	22.5943	22.5863	22.5868
Sorbitol	6tms	1931	22.6602	319	S-OL	Sorbitol$6tms	22.6623	22.6573	22.6655	22.6574	22.6613	22.6555	22.6681	22.6645	22.6683	22.6612	22.6612	22.6644	22.6577	22.6556	22.6629	22.6535	22.654	22.6575	22.6678	22.668	22.6608	22.6623	22.6543	22.6582
13C6-Sorbitol	6tms	1931	22.66	323	IS	13C6-Sorbitol$6tms	22.6589	22.6607	22.6655	22.6608	22.6613	22.6589	22.6579	22.6645	22.6649	22.6612	22.6612	22.661	22.6577	22.6522	22.6561	22.6603	22.654	22.6541	22.6576	22.6578	22.6574	22.6589	22.6577	22.6582
Tyrosine	3tms	1935	22.6679	382	AA	Tyrosine$3tms	22.67	22.67	22.67	22.66	22.66	22.67	22.66	22.66	22.67	22.66	22.66	22.67	22.66	22.65	22.66	22.66	22.65	22.65	22.67	22.66	22.66	22.67	22.65	22.66
Arginine | Ornithine	#4 (5tms)	2034	23.6639	214	AA	Arginine#4 (Ornithine$3tms)	23.6657	23.6675	23.6689	23.6642	23.6681	23.6623	23.6647	23.6645	23.6649	23.67	23.6646	23.6678	23.6611	23.659	23.6629	23.6603	23.6608	23.6609	23.6644	23.6612	23.6609	23.6623	23.6611	23.6616
myo-inositol	6tms	2089	24.1724	217	S-OL	myo-inositol$6tms	24.1725	24.1709	24.1791	24.1744	24.1749	24.1726	24.1715	24.1713	24.1751	24.1782	24.1748	24.1746	24.1713	24.1659	24.1731	24.1705	24.171	24.1677	24.1678	24.1714	24.1677	24.1725	24.168	24.1684
Phytol	1tms	2168	24.9188	143	APO	Phytol$1tms	24.9208	24.9192	24.924	24.9193	24.9198	24.9209	24.9198	24.9196	24.92	24.9231	24.9197	24.9196	24.9162	24.9142	24.918	24.9154	24.9159	24.9161	24.9161	24.9163	24.916	24.9208	24.9163	24.9133
bis-glycerol-Phosphate	5tms	2182	25.0469	357	PHOSPHO	bis-glycerol-P$5tms	25.0501	25.0485	25.0533	25.0486	25.0491	25.0467	25.0491	25.0489	25.0493	25.0524	25.049	25.0488	25.0455	25.04	25.0438	25.0447	25.0418	25.0419	25.0454	25.0456	25.0452	25.0467	25.0421	25.0426
C18:2 (Linoleic acid)	1tms	2205	25.2598	337	FA	C18:2$1tms	25.261	25.2594	25.2642	25.2595	25.2634	25.261	25.26	25.2598	25.2602	25.2632	25.2633	25.2631	25.2564	25.2543	25.2581	25.2556	25.2561	25.2562	25.2563	25.2599	25.2561	25.261	25.2564	25.2569
C18:1 (Oleic acid)	1tms	2212	25.3119	339	FA	C18:1a$1tms	25.3154	25.3104	25.3152	25.3139	25.3144	25.312	25.311	25.3108	25.3112	25.3177	25.3143	25.3141	25.3108	25.3087	25.3092	25.31	25.3105	25.3106	25.3107	25.3109	25.3072	25.312	25.3074	25.3079
Volemitol	5tms	2211	25.3128	319	S-OL	Volemitol$5tms	25.3018	25.29	25.2914	25.2765	25.2906	25.295	25.294	25.2904	25.2942	25.2768	25.3041	25.2903	25.2904	25.2883	25.2888	25.2998	25.2901	25.3038	25.2869	25.2905	25.2867	25.2882	25.287	25.2875
C18:3 (Linolenic acid)	1tms	2212	25.3182	335	FA	C18:3$1tms	25.3188	25.3172	25.322	25.3173	25.3178	25.3188	25.3212	25.3176	25.318	25.3245	25.3211	25.3209	25.3176	25.3121	25.316	25.3168	25.3139	25.3106	25.3175	25.3143	25.314	25.3188	25.3142	25.3147
C18:1 (Oleic acid isomer)	1tms	2218	25.3697	339	FA	C18:1b$1tms	25.3698	25.3716	25.3764	25.3717	25.3722	25.3698	25.3722	25.372	25.3724	25.3755	25.3721	25.3685	25.3686	25.3632	25.367	25.3678	25.3683	25.3684	25.3685	25.3687	25.3684	25.3698	25.3687	25.3657
Fructose-6-Phosphate	6tms / meox1	2298	26.0537	315	PHOSPHO	Fructose-6-P$meox1	26.0637	26.0621	26.0567	26.052	26.0559	26.0535	26.0457	26.0523	26.0527	26.049	26.0558	26.0556	26.0591	26.0502	26.0473	26.0481	26.0486	26.0453	26.0522	26.049	26.0487	26.0501	26.0489	26.046
Galactosylglycerol	6tms	2304	26.1113	204	SUG	Galactosylglycerol$6tms	26.1147	26.1131	26.1145	26.1132	26.1137	26.108	26.1137	26.1135	26.1139	26.117	26.1136	26.1134	26.1101	26.1047	26.1085	26.1093	26.1064	26.1065	26.11	26.1068	26.1099	26.1113	26.1068	26.1072
Glucose-6-Phosphate	6tms / meox1	2310	26.1628	387	PHOSPHO	Glucose-6-P$meox1	26.1726	26.1641	26.1655	26.1642	26.1681	26.159	26.1613	26.1612	26.1649	26.1646	26.1646	26.1645	26.1645	26.1557	26.1595	26.1604	26.1608	26.1576	26.161	26.1578	26.1609	26.1624	26.1578	26.1583
Glucose-6-Phosphate	6tms / meox2	2330	26.3349	387	PHOSPHO	Glucose-6-P$meox2	26.3426	26.3376	26.339	26.3377	26.3314	26.3359	26.3348	26.3278	26.3384	26.3415	26.3381	26.3379	26.338	26.3292	26.3262	26.327	26.3309	26.3276	26.3345	26.3313	26.331	26.3324	26.3279	26.3283
Myo-inositol-1-Phosphate	7tms	2408	26.9934	318	PHOSPHO	Myo-inositol-1P$7tms	26.9957	26.9941	26.9955	26.9942	26.9947	26.9923	26.9947	26.9945	26.9983	26.998	26.9946	26.9944	26.9945	26.989	26.9895	26.9903	26.9908	26.9909	26.991	26.9912	26.9909	26.9957	26.9911	26.9882
Sucrose	8tms	2636	28.7465	437	SUG	Sucrose$8tms	28.744	28.7458	28.7472	28.7459	28.743	28.7407	28.743	28.7462	28.7466	28.7565	28.7599	28.7529	28.7496	28.7476	28.7412	28.7522	28.7357	28.7392	28.7563	28.7565	28.7494	28.7406	28.7395	28.7331
Maltose	8tms / meox1	2739	29.5046	160	SUG	Maltose$meox1	29.5093	29.5077	29.5125	29.5078	29.5083	29.5094	29.5049	29.5013	29.5119	29.5184	29.5116	29.5047	29.5047	29.5027	29.5065	29.5073	29.5078	29.5046	29.5046	29.5048	29.5011	29.5059	29.5048	29.5086
Trehalose	8tms	2739	29.5404	191	SUG	Trehalose$8tms	29.5434	29.5418	29.5431	29.5418	29.5423	29.54	29.5423	29.5388	29.546	29.5456	29.5422	29.5387	29.5421	29.5367	29.5405	29.538	29.535	29.5386	29.5386	29.5388	29.5351	29.54	29.5388	29.5393
Maltose	8tms / meox2	2763	29.7063	160	SUG	Maltose$meox2	29.7134	29.7152	29.7166	29.7119	29.7124	29.7135	29.7158	29.7224	29.7126	29.6987	29.7157	29.7087	29.7088	29.7034	29.7072	29.7114	29.7085	29.7052	29.7155	29.7123	29.712	29.7168	29.7089	29.7059
Alpha-Tocopherol	1tms	3143	32.3115	502	APO	Alpha-Tocopherol$tms	32.3121	32.3139	32.3153	32.314	32.3179	32.3121	32.3111	32.3143	32.3113	32.3178	32.3144	32.3108	32.3109	32.3054	32.3093	32.3101	32.3106	32.3073	32.3074	32.3076	32.3107	32.3121	32.3075	32.308
Trehalose-6-Phosphate	9tms	3174	32.5221	315	PHOSPHO	Trehalose-6P$9tms	32.5264	32.5248	32.5194	32.5249	32.5322	32.5264	32.5288	32.532	32.529	32.5287	32.5253	32.5251	32.5252	32.5129	32.5134	32.521	32.5181	32.5216	32.5183	32.5253	32.525	32.523	32.5218	32.5189
Ergosterol	1tms	3243	33.0051	363	APO	Ergosterol$1tms	33.0026	33.0078	33.0092	33.0113	32.9982	33.0026	33.0118	33.0014	33.0086	33.0117	33.0083	33.0047	33.0048	32.9959	33.0032	33.004	33.0079	33.0046	33.0047	33.0049	33.008	33.006	33.0048	33.0019
Campesterol	1tms	3261	33.1301	382	APO	Campesterol$1tms	33.1284	33.1336	33.1384	33.1371	33.1376	33.1353	33.1342	33.1341	33.1378	33.1307	33.1341	33.1272	33.1238	33.1184	33.1324	33.1333	33.1337	33.1305	33.1339	33.1307	33.1304	33.1387	33.1273	33.1278
Stigmasterol	1tms	3285	33.3007	255	APO	Stigmasterol$1tms	33.2951	33.3105	33.2949	33.3038	33.3043	33.302	33.3009	33.3007	33.3045	33.311	33.2974	33.3074	33.2973	33.3123	33.2923	33.2999	33.297	33.3005	33.3006	33.3008	33.2971	33.2985	33.2906	33.3012
Beta-sitosterol	1tms	3341	33.6992	396	APO	Beta-sitosterol$1tms	33.6965	33.6983	33.7031	33.6984	33.6989	33.6965	33.6955	33.6987	33.6957	33.7124	33.7022	33.6884	33.6987	33.7034	33.6971	33.6945	33.6916	33.6917	33.6918	33.6886	33.6916	33.6999	33.6953	33.6958
